# Supplementary material for: Molecular Basis and Regulation of OTULIN-LUBAC Interaction
Source: PubMed Central journal article supplement (PMC4017264; doi:10.1016/j.molcel.2014.03.018), 2014-05-08
Supplement: mmc2.pdf [file mmc2.pdf]

# Molecular Basis and Regulation of OTULIN-LUBAC Interaction

Paul R. Elliott,<sup>1</sup> Sofie V. Nielsen,<sup>2,4</sup> Paola Marco-Casanova,<sup>1,4</sup> Berthe Katrine Fiil,<sup>2</sup> Kirstin Keusekotten,<sup>1</sup> Niels Mailand,<sup>2</sup> Stefan M.V. Freund,<sup>1</sup> Mads Gyrd-Hansen,<sup>2,3</sup> and David Komander<sup>1,\*</sup>

<sup>1</sup>Medical Research Council Laboratory of Molecular Biology, Francis Crick Avenue, Cambridge, CB2 0QH, UK

<sup>2</sup>Department of Disease Biology, Novo Nordisk Foundation Center for Protein Research, University of Copenhagen, 2200 Copenhagen, Denmark

<sup>3</sup>Present address: Ludwig Institute for Cancer Research, Nuffield Department of Clinical Medicine, University of Oxford, Oxford, OX3 7DQ, UK

<sup>4</sup>These authors contributed equally to this work

\*Correspondence: [dk@mrc-lmb.cam.ac.uk](mailto:dk@mrc-lmb.cam.ac.uk)

<http://dx.doi.org/10.1016/j.molcel.2014.03.018>

This is an open access article under the CC BY license (<http://creativecommons.org/licenses/by/3.0/>).

## SUMMARY

The linear ubiquitin (Ub) chain assembly complex (LUBAC) generates Met1-linked “linear” Ub chains that regulate the activation of the nuclear factor  $\kappa$ B (NF $\kappa$ B) transcription factor and other processes. We recently discovered OTULIN as a deubiquitinase that specifically cleaves Met1-linked polyUb. Now, we show that OTULIN binds via a conserved PUB-interacting motif (PIM) to the PUB domain of the LUBAC component HOIP. Crystal structures and nuclear magnetic resonance experiments reveal the molecular basis for the high-affinity interaction and explain why OTULIN binds the HOIP PUB domain specifically. Analysis of LUBAC-induced NF $\kappa$ B signaling suggests that OTULIN needs to be present on LUBAC in order to restrict Met1-polyUb signaling. Moreover, LUBAC-OTULIN complex formation is regulated by OTULIN phosphorylation in the PIM. Phosphorylation of OTULIN prevents HOIP binding, whereas unphosphorylated OTULIN is part of the endogenous LUBAC complex. Our work exemplifies how coordination of ubiquitin assembly and disassembly activities in protein complexes regulates individual Ub linkage types.

## INTRODUCTION

Protein ubiquitination is a versatile posttranslational modification in which Lys residues of substrates are modified with the small protein ubiquitin (Ub). Ub can be ubiquitinated itself, giving rise to polyUb chains. PolyUb chains regulate a wide variety of cellular processes ranging from protein degradation to activation of cellular signaling pathways (Hershko and Ciechanover, 1998; Komander and Rape, 2012). Because Ub itself has eight modification sites, a great variety of homotypic and heterotypic chains exist. It is becoming increasingly clear that different polyUb chains encode distinct signals and are independently and specif-

ically assembled, recognized, and disassembled (Behrends and Harper, 2011; Kulathu and Komander, 2012). The most well-studied polyUb signals are Lys48-linked chains that mediate proteasomal degradation (Hershko and Ciechanover, 1998) and Lys63-linked chains that have various nondegradative roles in nuclear factor  $\kappa$ B (NF $\kappa$ B) and other signaling pathways and in the DNA damage response (Chen and Sun, 2009).

Met1-linked or linear chains constitute a further important chain type in NF $\kappa$ B signaling (Tokunaga and Iwai, 2012; Walczak et al., 2012). Work by Kirisako et al. (2006) identified the linear Ub chain assembly complex (LUBAC), which consists of the chain-assembling E3 ligase HOIP as well as HOIL-1 and SHARPIN (Walczak et al., 2012). Importantly, deletion of the LUBAC component SHARPIN in mice (Gerlach et al., 2011; Ikeda et al., 2011; Tokunaga et al., 2011), or mutation of HOIL-1 in humans (Boisson et al., 2012), lead to hyperinflammatory phenotypes, indicating key roles of LUBAC and linear Ub chains in the response to infection and inflammation.

The remarkable specificity of HOIP for assembling Met1-linked chains resides in its RBR E3 ligase domain and a conserved C-terminal extension (Smit et al., 2012; Stieglitz et al., 2012b) and is now understood in molecular detail (Stieglitz et al., 2013). HOIP also comprises several NPL4 zinc finger (NZF) Ub binding domains (UBDs) that target it to ubiquitinated proteins (Haas et al., 2009), a Ub-associated (UBA) domain that mediates interactions with HOIL-1 (Yagi et al., 2012), and N-terminal PUB (peptide:N-glycanase/UBA- or UBX-containing proteins) and B box domains of unknown functions. PUB domains interact with the C terminus of the AAA+ ATPase p97 (also known as VCP, or cdc48 in yeast), which itself regulates a myriad of cellular signaling pathways, often in conjunction with the Ub system (Meyer et al., 2012).

Until recently, it was unclear how Met1-linked polyUb chains are hydrolyzed, given that many deubiquitinating enzymes (DUBs) are isopeptide specific and unable to hydrolyze Gly76-Met1 peptide bonds in Met1-linked chains (Komander et al., 2009; Mevissen et al., 2013). The majority of USP domain DUBs hydrolyze Met1 linkages with significantly lower activity in comparison to Lys linkages (Faesen et al., 2011).

Two reports recently identified FAM105B/OTULIN as an OTU domain DUB with high activity and unique specificity for

Met1-linked polyUb (Keusekotten et al., 2013; Rivkin et al., 2013). OTULIN and LUBAC have coevolved in higher eukaryotes, and OTULIN antagonizes processes involving LUBAC, including tumor necrosis factor  $\alpha$  (TNF $\alpha$ ), poly(I:C), and NOD2 signaling (Fiil et al., 2013; Keusekotten et al., 2013). OTULIN was also implicated in angiogenesis and may affect Wnt signaling (Rivkin et al., 2013).

Knockdown of OTULIN or overexpression of a catalytically inactive mutant results in increased ubiquitination of proteins with Met1 linkages and leads to the ubiquitination of LUBAC itself. This suggests that OTULIN protects LUBAC from autoubiquitination (Fiil et al., 2013; Keusekotten et al., 2013). Moreover, immunoprecipitation of SHARPIN copurified HOIP, HOIL-1 and OTULIN (Keusekotten et al., 2013), and OTULIN interacted with HOIP in proteomic experiments (Fu et al., 2014; Rivkin et al., 2013), indicating that OTULIN may associate with HOIP and/or LUBAC.

Here, we show that OTULIN interacts directly with the N-terminal PUB domain of HOIP via a conserved PUB-interacting motif (PIM) in OTULIN. The OTULIN PIM is necessary and sufficient to establish a high-affinity interaction with HOIP, which is >40-fold higher in affinity than a HOIP-p97 interaction. Structural studies explain this high affinity and the OTULIN-HOIP specificity. Point mutants on either side of the interface disrupt the interaction in vitro and in cells. Loss of the HOIP-OTULIN interaction disables OTULIN-dependent regulation of HOIP ubiquitination and OTULIN's capacity to efficiently shutdown LUBAC-induced NF $\kappa$ B activation, suggesting that OTULIN needs to be present on LUBAC to restrict Met1-polyUb signaling. Furthermore, complex formation is regulated by PIM phosphorylation.

## RESULTS

### Identification of a HOIP-OTULIN Interaction

Previous studies of OTULIN had suggested an interaction between OTULIN and LUBAC; however, although Rivkin et al. (2013) speculated that OTULIN forms a subcomplex with HOIP alone, we showed that SHARPIN immunoprecipitated OTULIN, HOIL-1, and HOIP (Keusekotten et al., 2013). Indeed, immunoprecipitation of overexpressed HOIP, but not HOIL-1, copurified endogenous OTULIN (Figure 1A). HOIP truncations were used to map the region of HOIP that interacts with OTULIN. This indicated that the N-terminal 185 amino acids (aa) spanning the PUB domain of HOIP were sufficient to coimmunoprecipitate endogenous OTULIN (Figures 1B and 1C). OTULIN interaction was increased in longer constructs (aa 1–436, also including B box and NZF domains); however, this longer construct also interacted with endogenous HOIP, suggesting that it harbors the oligomerization module of HOIP and that oligomerization of HOIP most likely enhances OTULIN binding (Figure 1C). Next, the HOIP-OTULIN interaction was verified in vitro. Constructs spanning the annotated PUB domain (aa 67–158) were insoluble, but including the conserved HOIP N terminus resulted in a stable fragment of HOIP (Figure S1A available online). This extended PUB domain construct (aa 1–184) is able to bind full-length OTULIN in analytical size-exclusion chromatography studies (Figure 1D).

### Structure of the HOIP PUB Domain

To understand structural features of the extended HOIP PUB domain, we crystallized and determined its structure to 3.0 Å resolution by molecular replacement with the use of coordinates deposited by the Structural Genomics Consortium (SGC; Protein Data Bank [PDB] ID 4JUY Figures 1E and S1B and Table 1). Our structure contains 13 molecules within the asymmetric unit that superimpose with a low root-mean-square deviation (rmsd; 0.9–1.2 Å; Figure S1C). As anticipated, residues 59–158 of HOIP form a PUB domain resembling that of PNGase, the only other PUB domain structurally characterized to date (Allen et al., 2006; Zhao et al., 2007). HOIP and PNGase superimpose with an rmsd of 7.2 Å for residues 59–158 of HOIP (Figure 1E), and most secondary structure elements are conserved (Figure 1F). In addition, the HOIP PUB domain contains two N-terminal helices and one C-terminal helix that contribute to the hydrophobic core of the PUB domain, revealing why shorter constructs were insoluble (Figure 1F). Hydrophobic residues within the N-terminal extension are conserved among most HOIP orthologs, suggesting that the extended fold is conserved (Figure S1A). A similar extension is not present in the N-terminal PUB domain of PNGase (Allen et al., 2006; Zhao et al., 2007) or in the only other protein in which a PUB domain has been annotated, UBXD1 (Kern et al., 2009) (Figure S1D). Consistently, a minimal UBXD1 PUB domain (aa 150–264) is soluble and functional (see below).

### Functional Surfaces in the HOIP PUB Domain

The PNGase PUB domain was shown to have two functional surfaces. The first one is the PIM pocket derived from a PNGase crystal structure in complex with a five-residue DDLYG PIM peptide corresponding to the p97 C terminus (Zhao et al., 2007). In this interaction, two key residues in the PIM peptide (Leu804 and Tyr805) form mainly hydrophobic interactions with a hydrophobic pocket, the PIM pocket (Zhao et al., 2007) (Figures 1F and 2A, see below). A second functional surface of the PNGase PUB domain is a binding site for Ub or the Ub-like domain of human Rad23 located on the opposite face of the PIM pocket (Kamiya et al., 2012).

To understand whether these functional surfaces were conserved in HOIP, we analyzed surface conservation of its PUB domain (Figures 2B and S1A). Most surface residues in HOIP, including those potentially involved in Ub interaction, are not conserved. Consistently, we were unable to detect binding of the HOIP PUB domain to Ub or Met1-linked diUb by nuclear magnetic resonance (NMR) analysis (Figure S2).

In contrast, the residues forming a putative PIM pocket are highly conserved in HOIP. The HOIP PIM pocket is formed by hydrophobic residues located on helices  $\alpha$ 4 (equivalent to helix  $\alpha$ 2 in PNGase, hereafter named  $\alpha$ A) and  $\alpha$ 5 (equivalent to helix  $\alpha$ 3 in PNGase, hereafter named  $\alpha$ B) and on the  $\beta$ 1 strand (compare Figures 2B and 1E). This suggested that the PIM pocket in HOIP is most likely important for OTULIN binding and that OTULIN might contain a PIM.

### Identification of a PIM in OTULIN

Using analytical size-exclusion chromatography analysis, we mapped the HOIP interaction site of OTULIN to its N-terminal

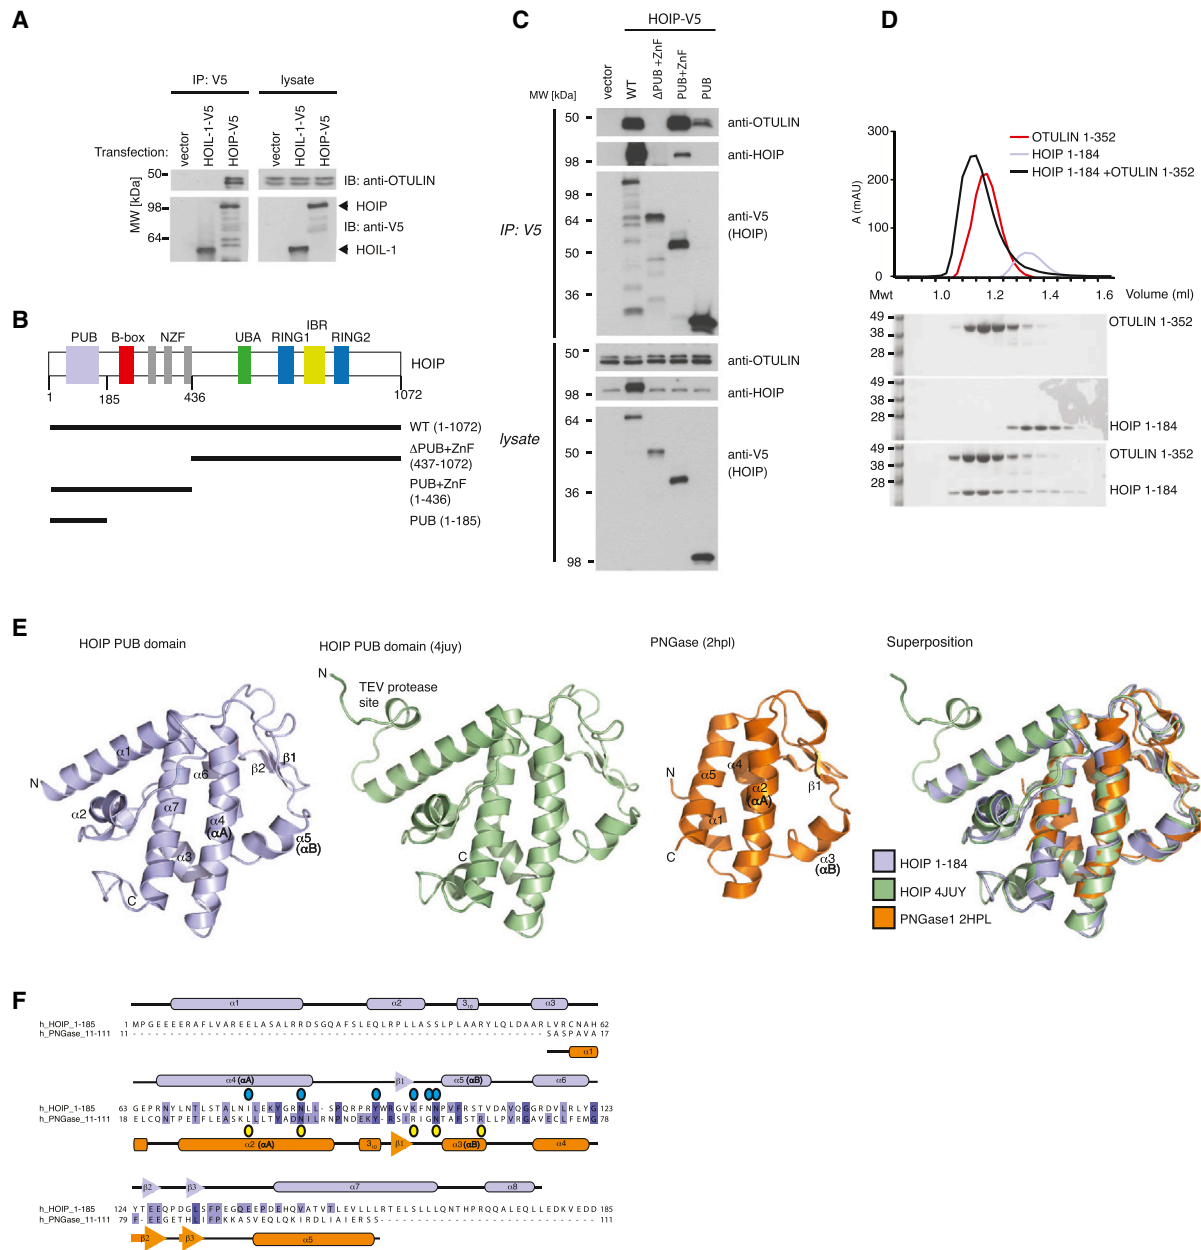

**Figure 1. OTULIN Binds the HOIP PUB Domain**

(A) Epitope-tagged HOIP or HOIL-1 were transfected into HEK293T cells, and interaction with endogenous OTULIN was determined by immunoprecipitation followed by western blot analysis. OTULIN interacts with HOIP but not HOIL-1 under these conditions.

(B) Domain representation of HOIP. A bar graph below indicates constructs used for domain mapping.

(C) Domains of epitope-tagged HOIP were transfected into U2OS and NOD2 cells and probed for endogenous OTULIN following the coimmunoprecipitation described in (A).

(D) Analytical size-exclusion chromatography profile of HOIP 1-184 (blue), full-length OTULIN (red), and 1:1.2 OTULIN:HOIP complex (black). Coomassie-stained SDS-PAGE gels below show protein-containing fractions.

(E) Left, extended HOIP PUB domain structure determined by the SGC (green, PDB ID 4JUY). Middle right, structure of PNGase PUB domain (orange, PDB ID 2HPL) (Zhao et al., 2007). Right, superposition. The SGC-determined HOIP structure includes an additional TEV protease cleavage site at the N terminus (see also Figure S5B).

(F) Structure-based sequence alignment of HOIP and PNGase PUB domains. HOIP contains two additional N-terminal helices and an additional C-terminal helix not found in PNGase. Open circles represent residues in HOIP (blue), and PNGase (yellow) that interact with the OTULIN/p97 PIMs, respectively.

**Table 1. Data Collection Statistics**

|                                                           | HOIP 1–184             | HOIP 5–180 + OTULIN 49–67 |
|-----------------------------------------------------------|------------------------|---------------------------|
| Data Collection                                           |                        |                           |
| Beamline                                                  | Diamond I04            | Diamond I02               |
| Space group                                               | C 2                    | $P 6_1$                   |
| <i>a</i> , <i>b</i> , <i>c</i> (Å)                        | 155.20, 99.57, 173.66  | 64.05, 64.05, 172.02      |
| $\alpha$ , $\beta$ , $\gamma$ (°)                         | 90.00, 99.88, 90.00    | 90.00, 90.00, 120.00      |
| Wavelength                                                | 0.9794                 | 0.9795                    |
| Resolution (Å)                                            | 65.75–3.00 (3.09–3.00) | 55.47–2.00 (2.05–2.00)    |
| $R_{\text{merge}}$                                        | 12.6 (45.1)            | 12.9 (60.4)               |
| <i>I</i> / $\sigma$ <i>I</i>                              | 6.9 (2.3)              | 5.9 (2.0)                 |
| Completeness (%)                                          | 99.6 (99.5)            | 99.9 (99.8)               |
| Redundancy                                                | 2.8 (2.8)              | 4.9 (5.2)                 |
| Refinement                                                |                        |                           |
| Resolution (Å)                                            | 62.61–3.00             | 55.47–2.00                |
| Number of reflections                                     | 52,158                 | 26,676                    |
| $R_{\text{work}} / R_{\text{free}}$                       | 21.8 (25.8)            | 20.2 (23.5)               |
| Number of atoms                                           |                        |                           |
| Protein                                                   | 18,228                 | 3,262                     |
| Ligand/ion                                                | 150                    | 3                         |
| Water                                                     | 16                     | 281                       |
| B factors                                                 |                        |                           |
| Wilson <i>B</i>                                           | 36.0                   | 22.4                      |
| Protein                                                   | 20.2                   | 29.8                      |
| Ligand/ion                                                | 43.2                   | 36.8                      |
| Water                                                     | 15.2                   | 32.8                      |
| rmsd                                                      |                        |                           |
| Bond lengths (Å)                                          | 0.003                  | 0.002                     |
| Bond angles (°)                                           | 0.740                  | 0.613                     |
| Ramachandran statistics (favored/allowed/outliers)        | 97.65/2.26/0.09        | 98.38/1.62/0.0            |
| Numbers in brackets are for the highest-resolution shell. |                        |                           |

80 aa, which was in agreement with previous data (Rivkin et al., 2013) (Figure S3A). Closer inspection of this region revealed low overall conservation, with the exception of a short invariant EEDMYR motif spanning residues 52–57 that resembled the p97 PIM (Figure 2C). We used a fluorescence polarization assay to test whether FITC-labeled OTULIN (aa 49–67) or p97 (aa 797–806) (Zhao et al., 2007) peptides were able to bind the HOIP PUB domain. The p97 peptide bound to the HOIP PUB domain with 7.6  $\mu$ M affinity, which is similar to other PUB-p97 interactions (Figure 2D, see below). Importantly, the OTULIN peptide bound HOIP with 180 nM affinity, a >40-fold increase in comparison to p97 (Figure 2D).

The realization that OTULIN contains a PIM immediately raised the intriguing possibility that OTULIN might interact with other PUB-domain-containing proteins. Hence, the binding of PIM peptides of OTULIN and p97 to the PUB domains of HOIP, PNGase, or UBXD1 was compared. All three domains bound fluorescently labeled p97 PIM peptide with similar affinity (3  $\mu$ M for

PNGase, 6  $\mu$ M for HOIP, and 12  $\mu$ M for UBXD1), which was in accordance with published isothermal titration calorimetry data (3  $\mu$ M for PNGase; Figure 2E) (Zhao et al., 2007). Interestingly, the OTULIN PIM bound to HOIP, but not to UBXD1 or PNGase, PUB domains (Figure 2F).

### Characterization of the HOIP-OTULIN Complex by NMR

We used NMR to further understand the molecular basis of the OTULIN-HOIP interaction. A  $^{15}$ N-labeled HOIP PUB domain construct (aa 1–184) was analyzed by BEST-TROSY (Solyom et al., 2013), revealing well-dispersed peaks (Figure 2G). Triple-resonance experiments with  $^{13}$ C- and  $^{15}$ N-labeled HOIP PUB domain protein allowed the assignment of 167 out of 186 amino acids.

Significant chemical shift perturbations (CSPs) were observed when unlabeled PIM peptides derived from OTULIN or p97 were added to labeled HOIP PUB domain (Figures 2G and 2H). Both peptides resulted in qualitatively identical CSPs (Figure 2H), suggesting similar binding modes. However, although the p97 peptide displayed CSPs indicative of fast-exchange behavior on the NMR time scale, the OTULIN peptide showed CSPs and loss of a large number of resonances, a feature common to slow exchange (Figure 2G, see also Figure S4A). This is consistent with a >40-fold higher affinity of the OTULIN peptide as observed by fluorescence polarization, and it most likely reflects a higher dynamic equilibrium for the p97 PIM peptide in comparison to a more stable interaction with the OTULIN PIM. A comparison of  $^{13}$ C-HSQC spectra, which monitor aliphatic side chain resonances, showed that only a small subset of peaks were perturbed. This indicated that peptide binding did not result in large-scale conformational changes in the HOIP PUB domain (Figure S3B).

Next, we tested whether the extended HOIP PUB domain interacted exclusively via the PIM or whether it formed additional interactions with the OTULIN OTU domain. For this,  $^{15}$ N-labeled HOIP PUB domain was mixed with full-length OTULIN (aa 1–352), OTULIN ovarian tumor (OTU) domain (aa 80–352), or the OTULIN PIM peptide (aa 49–67, see above). A comparison of the resulting spectra confirmed that the OTU domain did not interact with the HOIP PUB domain (Figures 2I, see Figures S4B and S4C for the full spectra). Importantly, the pattern of HOIP CSPs was identical upon the addition of either OTULIN PIM peptide or full-length OTULIN (Figures 2I and 2J). Moreover, despite forming a ~60 kDa complex, the spectra of the HOIP PUB domain were unaffected by line broadening, indicating that the PIM in OTULIN is quasi-independent from the OTU domain and displays the dynamic behavior of a small protein (Figures 2H and S4C). This revealed that the PIM is the sole binding site between OTULIN and the HOIP PUB domain.

### Structure of the HOIP PUB Domain in Complex with the OTULIN PIM

Having established the minimal requirements for the HOIP-OTULIN interaction, we set out to crystallize the complex. We determined the structure of a slightly truncated HOIP PUB domain construct (aa 5–180) bound to the OTULIN PIM peptide (aa 49–67) to 2.0 Å resolution (Figure 3A, Table 1). The two molecules in the asymmetric unit were highly similar to the apo



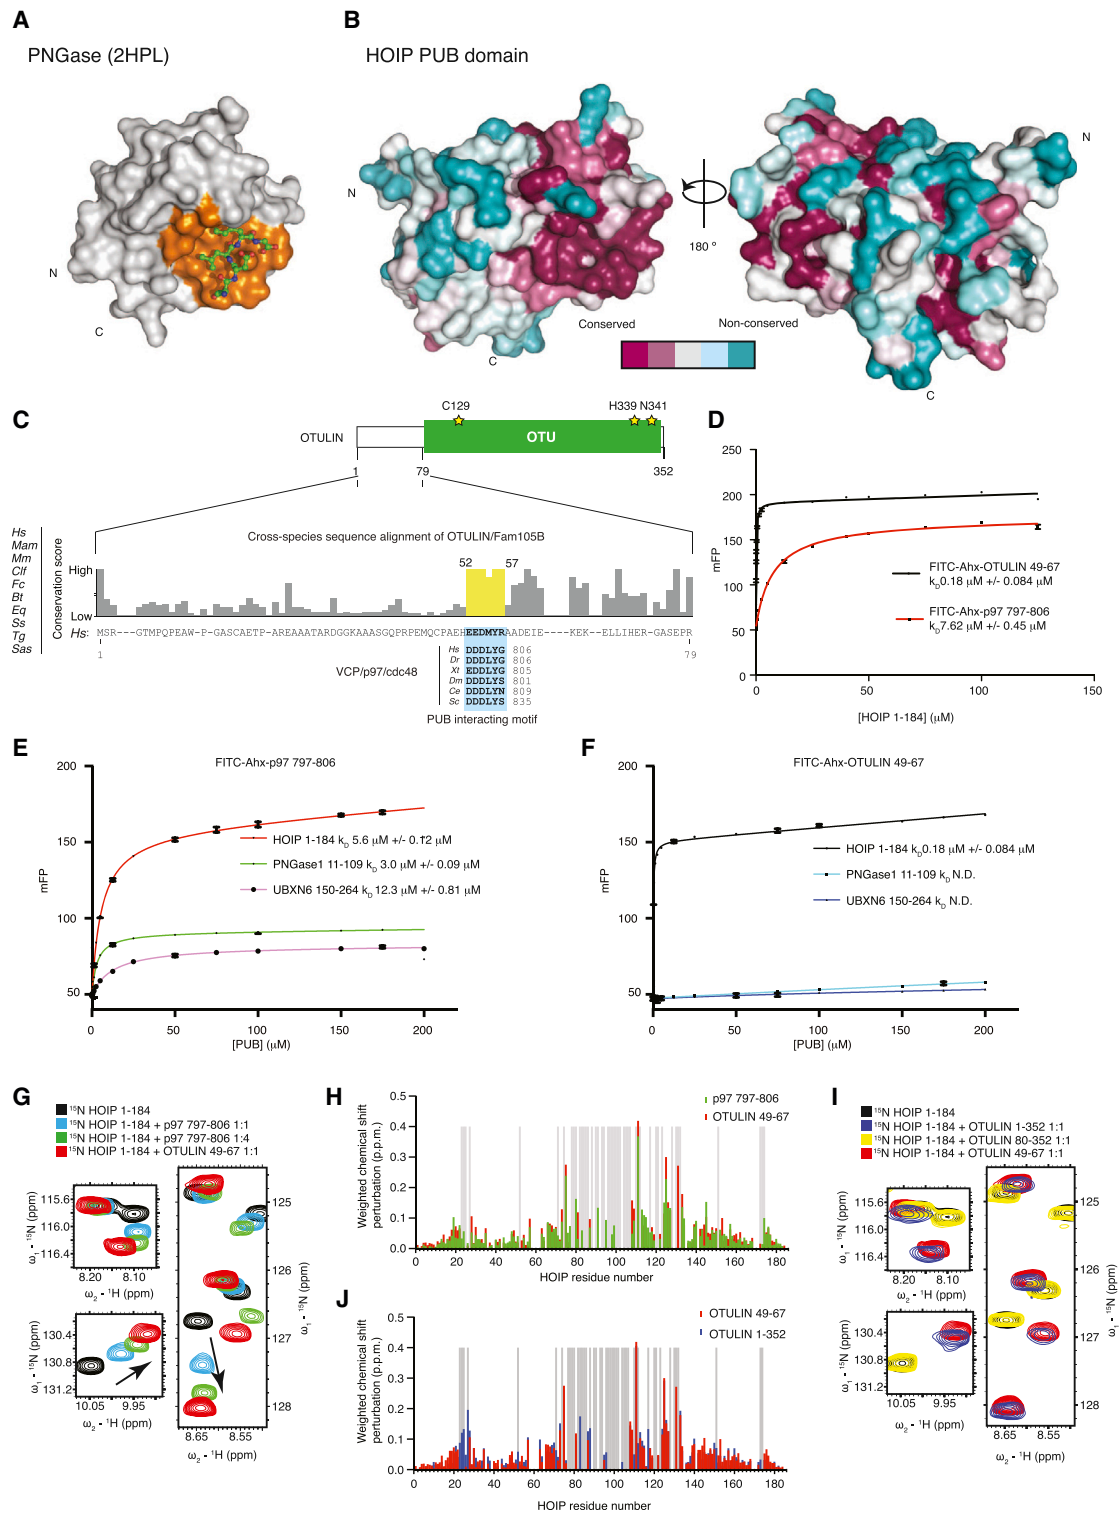

### Figure 2. A PUB-Domain-Interacting Motif in OTULIN

(A) Structure of PNGase bound to the p97 PIM peptide (PDB ID 2HPL) (Zhao et al., 2007) reveals the position of the PIM pocket.

(B) Surface conservation analysis of the HOIP PUB domain colored according to the sequence alignment in Figure S1A. The PIM pocket is highly conserved, whereas other regions, including the surface generated by the N-terminal PUB domain extension, are not conserved.

(C) Primary sequence alignment of the HOIP binding region in OTULIN (Figure S3A) (Rivkin et al., 2013). Alignment shows that the patch with highest evolutionary conservation resembles the p97 PIM.

(legend continued on next page)

structures (rmsd  $\sim 1.5$  Å; Figure S5A), which was consistent with NMR analysis (Figure S3B). Both HOIP molecules showed similarly well-defined electron density for residues 53–65 of the PIM peptide (Figure 3B). In analogy to the p97-PNGase interaction, only PIM residues 54–58 interact with HOIP. The PIM peptide forms a 90° kink, in which Met55 and Tyr56 form a bulge and mediate key hydrophobic interactions. Residues 49–52 and 66–67 are disordered in the crystal structure, and residues 53 and 59–65 protrude from the PUB domain without forming contacts.

As expected, the OTULIN PIM peptide binds to the conserved PIM pocket in the HOIP PUB domain (Figures 2B and 3). The key PIM residue Tyr56 is buried in a pocket formed by Tyr82 ( $\alpha$ A), Tyr124, and Pro92 and formed a hydrogen bond with Asn85 from HOIP. The second hydrophobic PIM residue, Met55, is bound in a shallower groove between HOIP PUB domain residues Tyr82, Ile78 ( $\alpha$ A), and Val104 ( $\alpha$ B; Figure 3D). In addition to these hydrophobic contacts, HOIP also forms a total of six hydrogen bonds with the backbone of the PIM peptide (Figures 3C and 3E).

Of special interest are Asp54 in the OTULIN PIM peptide and Asn102 in HOIP, given that these residues induce the 90° kink in the PIM peptide. Asp54 in the peptide binds in *cis* to the backbone amides of OTULIN Tyr56 and Arg57 and to the  $\delta$ -guanidyl group of Arg57. More importantly, Asn102 in the PUB domain acts as the cornerstone around which the peptide is wrapped and interacts with the very same backbone of Asp54, Tyr56, and Arg57. Hence, Asp54 and Asn102 induce the required kinked conformation of the PIM peptide in *cis* and *trans*, respectively, indicating that Asn102 is a key residue in the interaction (Figure 3E).

Arg57 of the PIM peptide participates in a  $\pi$ - $\pi$  stacking network with HOIP Tyr94, which is the only residue that undergoes a significant conformational change within the PIM pocket. In our apo structures, the side chain of Tyr94 is rotated to bind the HOIP Tyr pocket in *cis*, appearing to block access to the PIM pocket (Figure 3F). In the PIM peptide complex, a 90° rotation of the Tyr94 side chain displaces it from the PIM pocket (Figure 3G). Interestingly, Tyr94 is displaced from the PIM pocket in the apo structure determined by the SGC (PDB ID 4JUY). However, in this structure, residues from the tobacco etch virus (TEV) protease site constitute a pseudo-PIM and interact in *trans* with the PIM pocket of a neighboring molecule in the crystal lattice (Figure S5B).

We were able to independently verify the conformational change of Tyr94 upon PIM binding with the use of  $^{13}\text{C}$ -HSQC ex-

periments that allow monitoring changes in aromatic residues. Tyr94 aromatic ring protons undergo significant CSPs upon PIM binding. This suggests conformational opening and closing of the PIM pocket in HOIP (Figure 3H).

### Probing the HOIP-OTULIN Interaction

The observed binding modes of the OTULIN PIM peptide with the HOIP PUB domain were validated by mutational analysis. Mutations that affect the size and shape of the hydrophobic PIM pocket (Y82F, V104A, and N85A) reduced binding affinities 10- to 50-fold (Figure 3I). Importantly, even conservative mutation of the aforementioned cornerstone residue Asn102 to Asp (N102D) or Gln (N102Q) abolished HOIP binding to OTULIN (Figure 3I).

To test mutations in OTULIN, we synthesized fluorescently labeled OTULIN peptides with point mutations in Tyr56 (Y56A, Y56F, and Y56W), Met55 (M55D), and Asp54 (D54A). As anticipated, Y56A and M55D mutations abrogated binding, whereas Y56F or Y56W mutation greatly reduced binding (>400- and 100-fold, respectively). Destabilization of the Asp54-induced conformation of the PIM peptide resulted in a 60-fold reduction of HOIP binding (Figure 3J), indicating that stabilizing the kink in the PIM peptide is crucial for PUB interaction.

### Understanding OTULIN-HOIP Specificity

Although the structural data revealed the molecular basis for HOIP-OTULIN interaction, a number of questions regarding the observed specificity of the interaction remained. In particular, HOIP bound p97 with >40-fold reduced affinity in comparison to OTULIN, and the reason for this difference must reside in the distinct PIMs of the two proteins. Second, although p97 was promiscuous, OTULIN was unable to bind other PUB domains, indicating key differences in the involved PUB domains.

### Understanding HOIP Specificity for OTULIN

To understand these specificity considerations, we compared the binding modes of OTULIN-HOIP to those of p97-PNGase (Figures 4A and 4B). The key differences in the OTULIN PIM peptide are the C-terminal extension not present in the C-terminal p97 peptide and the exchange of Leu-Tyr-Gly in p97 for Met-Tyr-Arg in OTULIN. Apart from this, the PIM peptides can be superimposed well (Figure 4C).

A fluorescently labeled OTULIN peptide in which Met55 was exchanged to Leu (as in p97) bound HOIP with near-identical affinity (370 nM), showing that the small change in the first hydrophobic residue did not account for the difference (Figure 3J). Next, we speculated that HOIP did not form similar

(D) Affinity measurements using HOIP PUB domain against FITC-Ahx-labeled p97 PIM peptide (aa 797–806) and OTULIN PIM peptide (aa 49–67). Experiments were performed in triplicate, and errors represent SD from the mean.

(E) Binding of PUB domains from HOIP (aa 1–184, red), PNGase (aa 11–109, green), and UBXD1 (aa 150–264, magenta) to a fluorescent p97 PIM peptide (aa 797–806) as in (D).  $K_D$  values are indicated, and errors represent SD from the mean from triplicate experiments.

(F) Binding of PUB domains as in (E) to the OTULIN PIM peptide.

(G)  $^{15}\text{N}$ -transverse relaxation optimized spectroscopy (TROSY) spectra of HOIP alone (black), HOIP bound to OTULIN PIM peptide at a 1:1 molar ratio (red), and HOIP bound to p97 PIM peptide at a 1:1 (blue) and 1:4 ratio (green). Selected perturbed resonances are shown. For the full spectra, see Figure S4A.

(H) Chemical shift map by HOIP residue number for perturbation by p97 and OTULIN PIM peptides.

(I)  $^{15}\text{N}$ -TROSY spectra of HOIP alone (black), HOIP bound to OTULIN PIM peptide (red), HOIP bound to full-length OTULIN (blue), and HOIP with OTULIN catalytic domain (aa 80–352, yellow), all at a 1:1 molar ratio. The same resonances as in (G) are shown. For the full spectra, see Figures S4B, 4C, and 3.

(J) Difference map of chemical shifts between HOIP bound to PIM peptide or full-length OTULIN derived from respective spectra in (I).

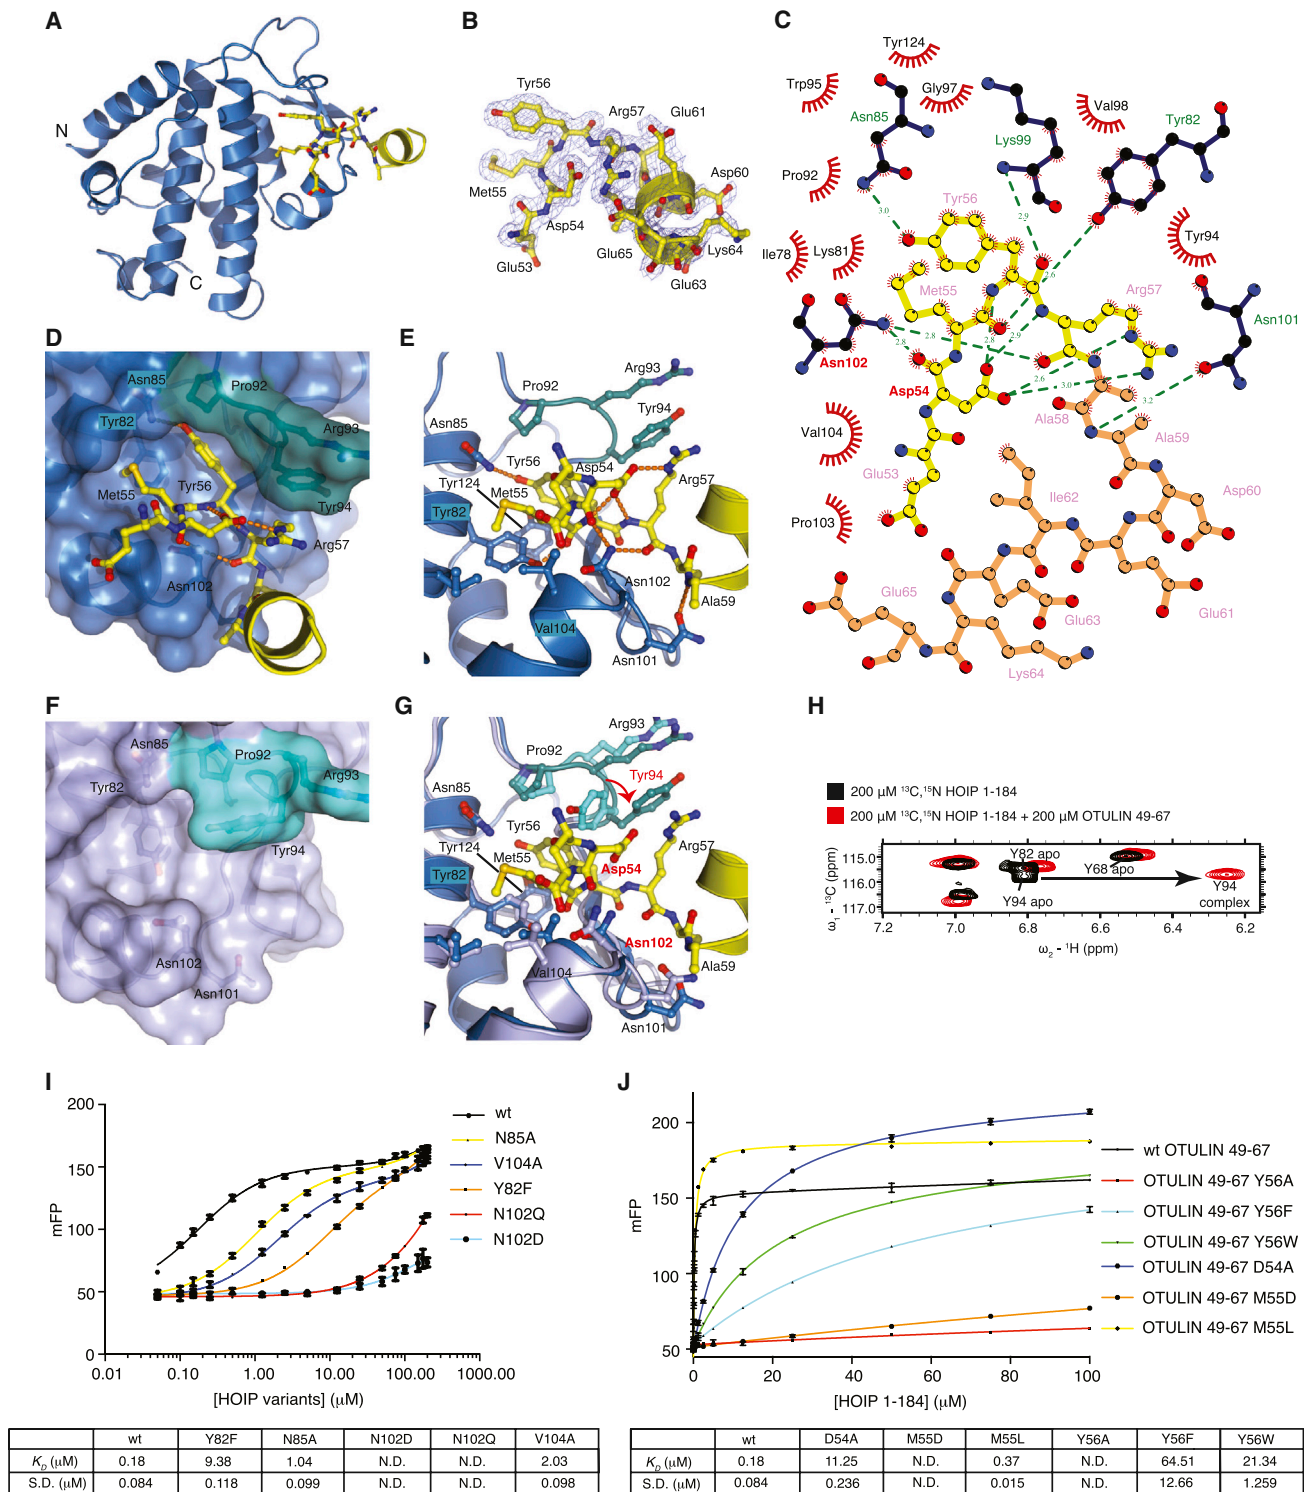

**Figure 3. Structure of HOIP Bound to OTULIN Peptide**

(A) Structure of HOIP PUB domain (aa 5–180; blue) bound to the OTULIN PIM peptide (yellow). The peptide is in ball-and-stick representation with blue nitrogen and red oxygen atoms.

(B) A weighted  $2|F_o|-|F_c|$  map contoured at  $1 \sigma$  covering the OTULIN PIM peptide colored as in (A).

(C) LIGPLOT representation of the HOIP-OTULIN interaction. Residues in the PIM (aa 53–57) are shown in yellow, and the C-terminal extension of the PIM is shown in orange. Hydrogen bonds are shown by green dashes, and van der Waals contacts are shown as red fans.

(legend continued on next page)

interactions with the p97 C terminus. In PNGase, this group forms two hydrogen bonds with the PUB domain residue Arg55 (Figure 4B). In HOIP, the equivalent position is Lys99, the side chain of which does not interact with the OTULIN PIM (Figure 4A). K99R mutation had similar marginal effects on OTULIN or p97 interaction (Figure 4D). HOIP uses Asn101 to bind to Ala59 of the OTULIN PIM (Figure 4A), which has no equivalent in the p97 PIM (Figure 4B), and Asn101 would be too far to contact the p97 C terminus. Importantly, mutation of HOIP Asn101 to Arg improved p97 binding 9-fold (from 7.6–0.9  $\mu\text{M}$ ; Figure 4D), suggesting that the introduced Arg101 contacts the p97 C terminus and now contributes to the interaction. Interestingly, the N101R mutation does not significantly affect OTULIN interaction (180 versus 100 nM; Figure 4D), suggesting that HOIP has selectively weakened p97 interaction in order to gain specificity for OTULIN.

Despite the high-affinity, and seemingly more stable, interaction between HOIP and OTULIN, the interaction between HOIP and p97 was still significant and similar to other PUB-p97 interactions (Figure 2E). To test whether p97 can still bind HOIP in the presence of OTULIN, we measured its ability to compete for the PIM pocket in a fluorescence polarization competition assay. Interestingly, the p97 PIM peptide competed poorly with the OTULIN PIM for the HOIP binding site ( $K_i$  of 37  $\mu\text{M}$ ; Figure S6A). This strengthens the observation that the HOIP-OTULIN interaction is significantly more stable than a HOIP-p97 interaction.

#### Understanding OTULIN Specificity for HOIP

Differences in the PIM pocket of HOIP and PNGase explain the observed specificity of OTULIN for the HOIP PUB domain. Superposition of the PIM peptides in both complexes aligns the  $\alpha\text{B}$  helices containing the crucial cornerstone Asn residues and the  $\beta\text{1}$  strands. However, the remaining core helices including  $\alpha\text{A}$  display a  $\sim 30^\circ$  rotation, leading to a different overall disposition of hydrophobic residues (Figure 4E). This suggests the presence of a hinge between the helical core (including  $\alpha\text{A}$ ) of the PUB domain and the  $\alpha\text{B}$ - $\beta\text{1}$  subdomain. Indeed, the loops between  $\alpha\text{A}$  and  $\beta\text{1}$  are well ordered, conserved, and conformationally identical in all structures of the respective PUB domains but structurally highly divergent in HOIP and PNGase (Figure 4E). The HOIP  $\alpha\text{A}$ - $\beta\text{1}$  loop contains Tyr94 that undergoes a conformational change upon PIM binding (see above). In contrast, the equivalent Tyr51 in PNGase provides a seemingly solid sidewall to the PIM pocket and is conformationally rigid. This difference in Tyr positioning and flexibility shapes the PIM pocket, which is deeper in HOIP than it is in PNGase. Consistently,

superposition of the PUB domains reveals that the OTULIN PIM has moved by 1.5  $\text{\AA}$  deeper into the HOIP PIM pocket, most likely explaining the observed high affinity for the OTULIN-HOIP interaction (Figures 4C and S6B).

Moreover, this difference in size and shape of the PIM pocket explains why PNGase cannot bind OTULIN. Although superposition of the OTULIN PIM onto PNGase does not reveal significant clashes (Figure 4E), the larger Met in the OTULIN PIM (versus Leu in p97) may be too big for PNGase. However, a fluorescently labeled OTULIN PIM with M55L mutation that mimics the Leu-Tyr of the p97 sequence was still unable to bind PNGase (Figure 4F). Another key difference in the PUB domains is Arg55 in PNGase, which binds the C terminus and “closes” the PIM pocket, potentially disallowing the binding of C-terminally extended PIM peptides, as found in OTULIN. The equivalent Lys101 in HOIP points away from the PIM pocket (see above). Indeed, we started to detect an OTULIN-PNGase interaction when Arg55 was mutated to Ala ( $K_D$  43  $\mu\text{M}$ ; Figure 4F). Importantly, when this PNGase mutant was tested with the OTULIN M55L PIM peptide, full binding was recovered ( $K_D$  5  $\mu\text{M}$ ; Figure 4F). Hence, with point mutations in OTULIN to generate a more p97-like PIM and in PNGase to remove the requirement for a C-terminal PIM as in p97, we have engineered a  $\mu\text{M}$  binding interface in two proteins that did not interact previously. This confirms that the specificity of OTULIN for the HOIP PUB domains originates from a slightly larger PIM pocket in HOIP that allows binding of internal PIMs.

#### Characterization of OTULIN-HOIP Interactions In Vivo

Having characterized the PUB-PIM interaction in vitro, we wondered whether it was responsible for HOIP-OTULIN interaction in cells. For this, we first overexpressed V5-tagged HOIP wild-type or HOIP with point mutations in the PUB binding site and then tested its ability to coimmunoprecipitate endogenous OTULIN. Although wild-type HOIP coprecipitated OTULIN, mutations Y82A and N102D abrogated OTULIN binding, and Y82F and K99E decreased binding (Figure 5A), which was consistent with the roles of these residues in PIM binding (see above).

For the reverse experiment, we overexpressed full-length OTULIN or OTULIN with point mutations in the PIM and monitored their interactions with endogenous LUBAC components. HA-tagged OTULIN coimmunoprecipitated all proteins from the endogenous LUBAC complex, whereas mutations of Tyr56 (Y56F, Y56A, and Y56E) abrogated binding. Residual binding was still observed with an OTULIN D54A mutant, which most

(D) PIM pocket shown in surface representation in the HOIP-OTULIN complex colored as in (A). Residues 92–94, including the mobile Tyr94, are colored green.

(E) Close-up view of the OTULIN PIM peptide in the HOIP PIM pocket, colored as in (A), showing hydrogen bonds as orange dotted lines.

(F) PIM pocket shown in surface representation in apo HOIP, in which Tyr94 (green) partly occludes the PIM pocket.

(G) Superposition of apo and PIM-peptide-bound HOIP highlighting the conformational change in Tyr94 side chain.

(H) A conformational change of the Tyr94 side chain is resolved in the aromatic region of  $^{13}\text{C}$ -HSQC spectra, with HOIP alone (black) and the HOIP OTULIN PIM complex spectrum shown in red. The shifting resonance indicated by an arrow corresponds to the  $\text{C}_\epsilon$  of Tyr94. Only the  $\text{C}_\epsilon$  region of the aromatic  $^{13}\text{C}$ -HSQC is shown.

(I) Fluorescent polarization assay of wild-type OTULIN PIM peptide binding to purified HOIP (aa 1–184) PIM pocket mutants. Binding parameters are listed below. Experiments were performed in triplicate, and errors represent SD from the mean.

(J) Binding of HOIP PUB domain (aa 1–184) to OTULIN peptides (aa 49–67) with the indicated point mutations in the PIM performed as in (I). Binding parameters are listed below.



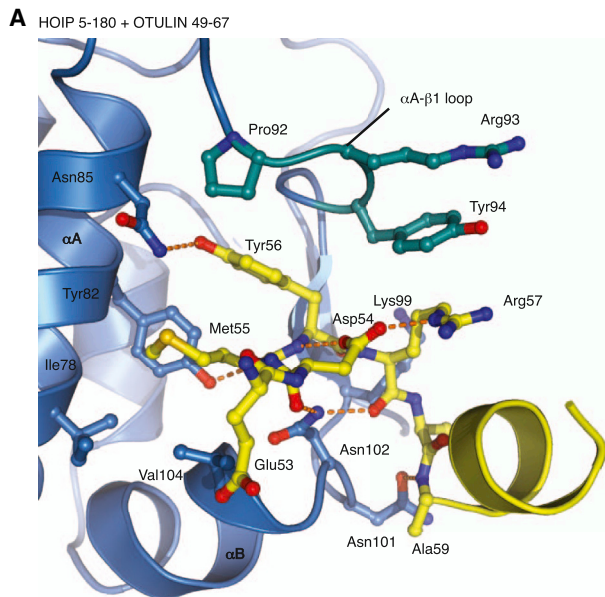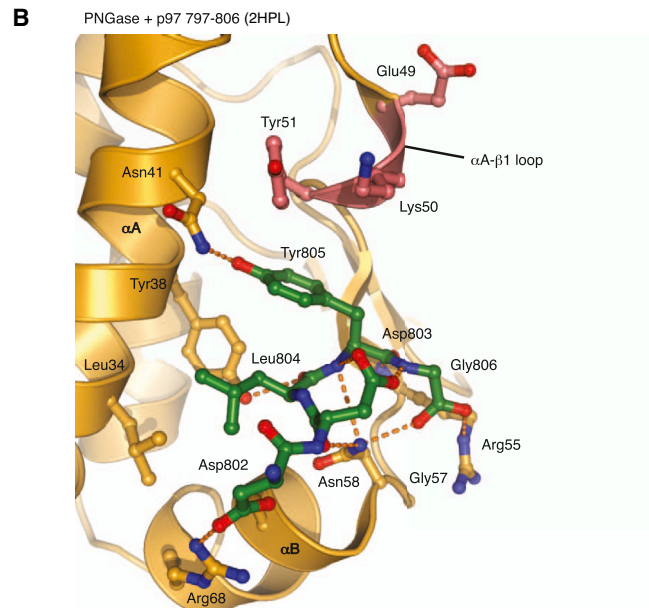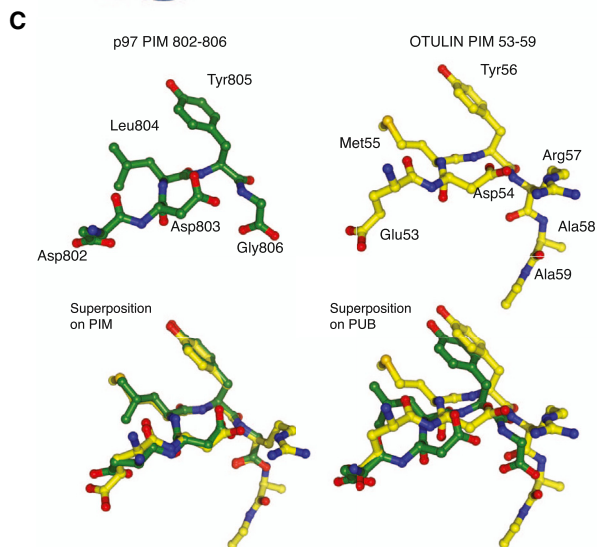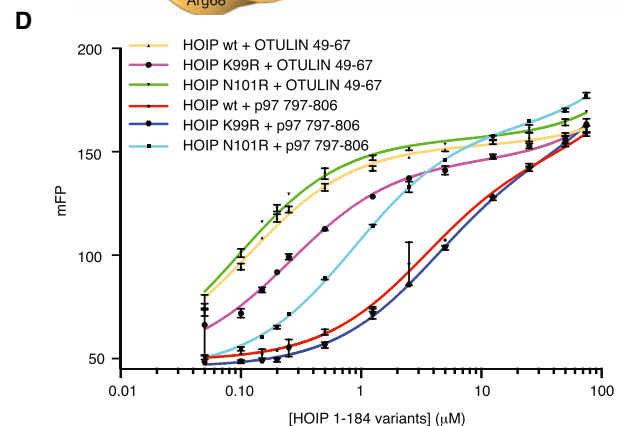

| HOIP variant            | FITC-Ahx-OTULIN 49-67 |       |       | FITC-Ahx-p97 797-806 |       |       |
|-------------------------|-----------------------|-------|-------|----------------------|-------|-------|
|                         | wt                    | K99R  | N101R | wt                   | K99R  | N101R |
| $K_D$ ( $\mu\text{M}$ ) | 0.18                  | 0.26  | 0.10  | 5.6                  | 4.11  | 0.87  |
| S.D. ( $\mu\text{M}$ )  | 0.084                 | 0.021 | 0.006 | 0.325                | 0.210 | 0.024 |

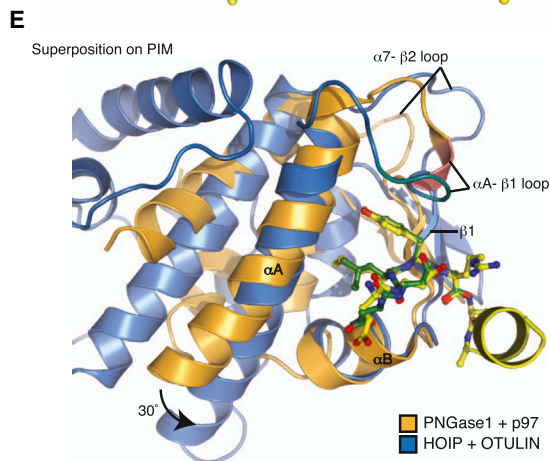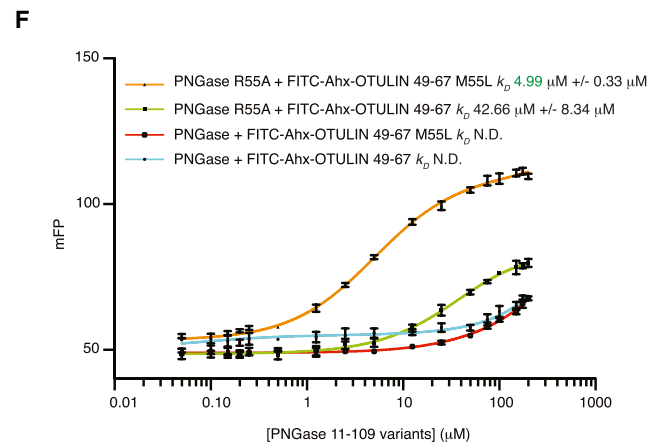

(legend on next page)

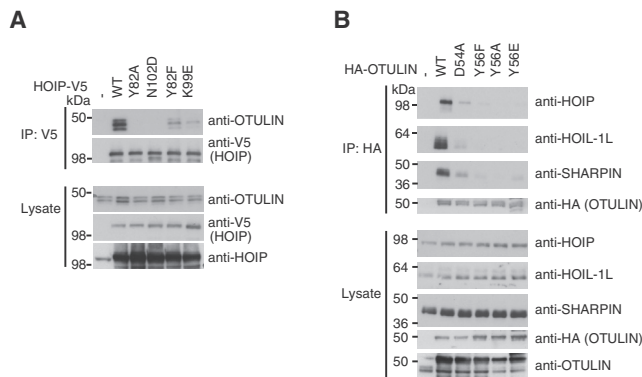

**Figure 5. Verification of HOIP-OTULIN Interactions in Cells**

(A) Experiments performed as in Figure 1A with HOIP point mutations in the PIM pocket and testing the binding of endogenous OTULIN as detected by an OTULIN antibody.

(B) HA-tagged OTULIN or OTULIN PIM mutants were expressed in HEK293T cells immunoprecipitated with anti-HA-Agarose resin, and LUBAC components HOIP, HOIL-1, and SHARPIN were detected by western blotting against endogenous components.

likely only destabilizes the kink in the PIM peptide (see Figure 3J). This showed that the HOIP-OTULIN interaction in cells could be modulated by single point mutations on either side of the interface (Figure 5B).

### Functional Consequences of Modulating the HOIP-OTULIN Interface

So far, the cellular consequences of OTULIN-LUBAC interaction are unclear. We have previously shown that knockdown of OTULIN or overexpression of a catalytically inactive OTULIN C129A mutant (CA) lead to the autoubiquitination of HOIP with Met1-linked polyUb chains (Fil et al., 2013; Keusekotten et al., 2013) (Figure 6A, compare lanes 1 and 4; Figure 6B, compare lanes 1 and 2). We wondered whether this depended on the formation of the OTULIN-HOIP complex or whether OTULIN would act *trans* on the complex. When coexpressed with HOIL-1, HOIP PUB binding mutants autoubiquitinated in cells expressing endogenous OTULIN, and knockdown of OTULIN did not increase HOIP ubiquitination (Figure 6A). This observation suggests that, under basal conditions, the binding of OTULIN prevents HOIP autoubiquitination. Supporting this, ectopic expression of an inactive OTULIN with a mutation in the PIM (Y56A) did not lead to HOIP autoubiquitination, whereas inactive

OTULIN with an intact PIM led to extensive HOIP ubiquitination (Figure 6B). Identical results were obtained when the activity of endogenous HOIP was induced by the NOD2 stimulus L18-MDP (Figure 6B) or treatment with TNF (Figure 6C). To investigate the functional importance of the HOIP-OTULIN interaction on NF $\kappa$ B signaling, we first coexpressed HOIP and HOIL-1 together with wild-type OTULIN or the PIM mutant Y56A. Although OTULIN Y56A was consistently slightly less potent in inhibiting NF $\kappa$ B activity in comparison to wild-type OTULIN, the assay revealed the difficulty in comparing different OTULIN variants functionally by overexpression (Figure S7), as reported previously (Rivkin et al., 2013).

Instead, we tested how mutations in the HOIP PUB binding site would affect the capacity of wild-type OTULIN to inhibit LUBAC-induced NF $\kappa$ B activity. Importantly, mutation of the cornerstone residue Asn102 to Asp (N102D) or a mutation that affect the hydrophobic PIM pocket (Y82A) reduced the ability of OTULIN to antagonize LUBAC-induced NF $\kappa$ B activity in comparison to wild-type HOIP (Figure 6D). This reveals that OTULIN has to be present on LUBAC in order to regulate NF $\kappa$ B signaling.

### Regulation of OTULIN-LUBAC Interaction by Phosphorylation

Next, we wondered whether OTULIN was indeed part of LUBAC at the endogenous level. For this, we purified the endogenous LUBAC complex from human embryonic kidney 293ET (HEK293ET) cell lysates by gel filtration (Figure 7A). As reported previously (Kirisako et al., 2006), HOIP and HOIL-1 formed an approximately 600 kDa complex, and SHARPIN eluted quantitatively in this size range. The LUBAC complex is of similar size to recombinant p97 hexamers or to cellular p97 complexes. Bacterially purified OTULIN is monomeric and elutes according to its mass at ~40 kDa. To our surprise, the majority of endogenous OTULIN in HEK293ET cells (>95%) eluted in a size range of ~100–150 kDa, and only a small fraction seemed to coelute with the endogenous LUBAC complex (Figure 7A). Similar data were obtained in U2OS and RPE1 cells (Figure S8). This was in contrast to our findings that the HOIP PUB-OTULIN interaction was stable on gel filtration (Figure 1D). Although there were many potential reasons for why the interaction was unstable in cells, one intriguing possibility was that binding of OTULIN to HOIP was dynamically regulated. Indeed, OTULIN is phosphorylated in cells, and the prime site for phosphorylation is the PIM residue Tyr56 (<http://phosphosite.org/proteinAction.do?id=2470471>; Figure 7B). A Tyr56-phosphorylated PIM peptide was unable to bind HOIP, which is consistent with our

**Figure 4. Specificity of the HOIP-OTULIN Interaction**

(A) Close-up view of the HOIP PUB domain (blue) bound to OTULIN PIM (yellow) as in Figure 3E. Interacting residues are shown in ball-and-stick representation and labeled. Hydrogen bonds are indicated as orange dotted lines.

(B) Same view as in (A) for the PNGase-p97 complex (PDB ID 2HPL) (Zhao et al., 2007). Residues 49–51 that differ structurally from HOIP are colored red.

(C) PIM peptides from p97 (green) and OTULIN (yellow) can be perfectly superimposed (bottom left) but do not align once PUB domains are superposed because of deeper binding of the OTULIN PIM in the HOIP PIM pocket.

(D) Fluorescence polarization assays of HOIP N101R/K99R mutants with FITC-Ahx-labeled p97 (797–806) or OTULIN (49–67) PIMs as described in Figure 2D. Binding parameters are listed below. Experiments were performed in triplicate, and errors represent SD from the mean.

(E) Superposition on the PIM of PNGase-p97 (orange and green) and HOIP-OTULIN (blue and yellow) shows perfect alignment of the Asn cornerstone residue but also the misalignment of PUB domain core helices, indicating different binding modes.

(F) Fluorescence polarization assays of PNGase and FITC-Ahx-labeled OTULIN (49–67) with point mutations in the PUB domain and the PIM peptide that promote binding of OTULIN PIM to PNGase. Experiments were performed in triplicate, and errors represent SD from the mean.

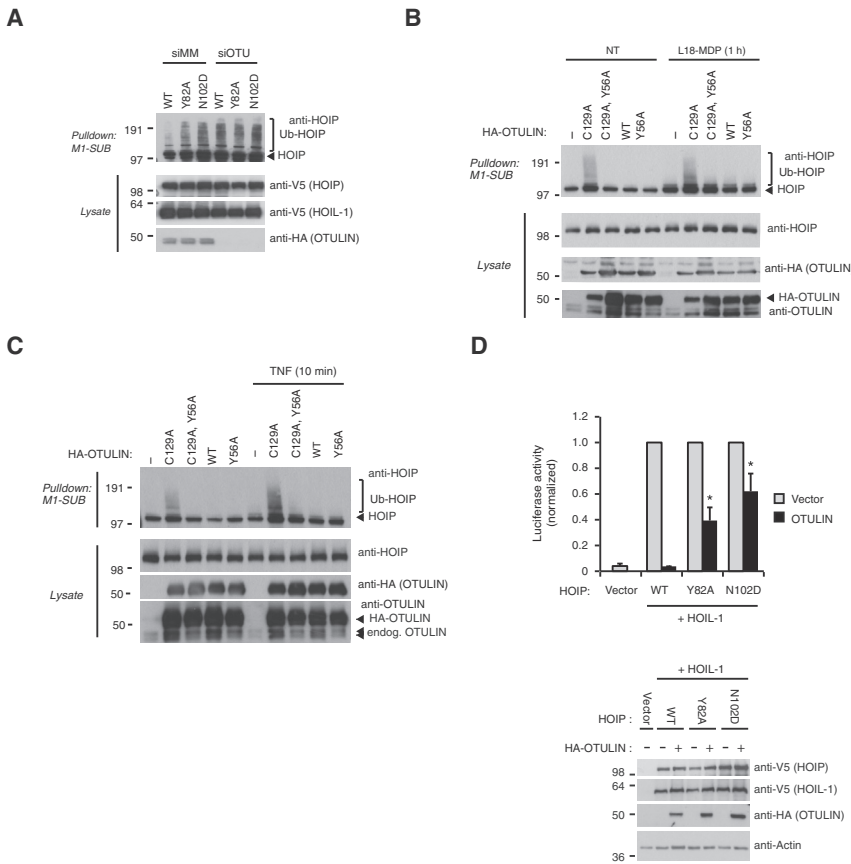

**Figure 6. Functional Consequences of the OTULIN-LUBAC Interaction**

(A) Purification of endogenous Ub conjugates with Met1-specific Ub binding domain (Keusekotten et al., 2013) in lysates of HEK293T control and OTULIN-depleted cells transfected with HOIP variants and HOIL-1. Purified material and lysate was examined by immunoblotting. Mutation of the HOIP PIM pocket results in spontaneous accumulation of Met1-linked polyubiquitin on HOIP.

(B and C) Purification of endogenous Ub conjugates with M1-SUB in U2OS and NOD2 cells transfected with the indicated OTULIN variants and treated with L18-MDP (B) or TNF (C). Purified material was analyzed as in (A). Mutation of the OTULIN PIM impairs stabilization of HOIP ubiquitination by catalytic inactive (C129A) OTULIN under basal conditions and after stimulation.

(D) NF $\kappa$ B reporter activity in lysates of HEK293T cells transfected with HOIL-1, HOIP, or HOIP PIM pocket mutants and with or without the expression of OTULIN. OTULIN abrogated NF $\kappa$ B activity induced by wild-type LUBAC but was less effective in inhibiting activity induced by HOIP PIM pocket mutants.

structural data (Figure 7C). Importantly, the distribution of OTULIN changed significantly when HEK293ET lysates were prepared in the absence of phosphatase inhibitors. Although OTULIN eluted in a single peak when phosphatases are inhibited (Figure 7A), phosphatase activity resulted in two peaks at 600 and 40 kDa. This suggested that OTULIN is indeed phosphorylated in HEK293ET cell lysates and that dephosphorylation leads to quantitative association with LUBAC. OTULIN may be more abundant than LUBAC and HOIP, given that a significant fraction of dephosphorylated OTULIN is not bound to HOIP and elutes as a monomer. Altogether, this suggests that the abundance of OTULIN on LUBAC is regulated by phosphorylation of the OTULIN PIM.

## DISCUSSION

Here, we reveal the molecular basis for the interaction of Met1-processing machineries, namely between the chain assembling LUBAC complex and the Met1-specific DUB, OTULIN. This is yet another example of interaction of a DUB with an E3 ligase in analogy to well-established complexes such as MDM2-USP7 (Li et al., 2004) or BRAP-USP15 (Hayes et al., 2012). What is unique about this complex is that all components are exquisitely specific for Met1-linked polyUb. The entire machinery appears to have coevolved to regulate this particular Ub chain type, and it is tempting to speculate that other chain types are regulated in a similar manner. We recently showed that OTU domain DUBs are

highly linkage specific and include members with defined preference for rare atypical linkages (Mevisen et al., 2013). It will be interesting to see whether these DUBs associate with E3 ligases to form chain-type-specific processing complexes.

Our work assigns a function to the previously unstudied PUB domain of HOIP, which mediates the interaction with a short, conserved PIM in the OTULIN N terminus. PUB domains are found in only a handful of proteins that bind p97, including PNGase and UBXD1 (Allen et al., 2006; Suzuki et al., 2001). UBXD1 also contains a UBX domain and binds p97 via two interfaces (Kern et al., 2009). Interestingly, despite structural similarity and HOIP's ability to bind p97 peptides with similar affinity to other PUB domains, PNGase or UBXD1 cannot bind OTULIN. Moreover, PUB domains were not known to bind to internal sequences, and we show that a two-residue hydrophobic motif and a kink in the PIM peptide is necessary for interacting with PUB domains. This realization may lead to the identification of PIMs in other proteins and binding partners for PUB domain proteins, including HOIP. Although the shortness of the motif poses significant challenges to identifying PIMs by bioinformatic means, recent methods to predict that similarly short LC3-interacting motifs may be applicable (Kraft et al., 2012).

Despite its importance, the composition of the LUBAC complex is currently unclear. HOIP (120 kDa) and HOIL-1 (58 kDa) form a ~600 kDa complex when purified from eukaryotic cells (Kirisako et al., 2006). Subsequently, SHARPIN (40 kDa) was shown to be an additional LUBAC component (Gerlach et al., 2011; Ikeda et al., 2011; Tokunaga et al., 2011) and was subsequently shown to dimerize (Stieglitz et al., 2012a). Here, we reveal that also SHARPIN participates in a 600 kDa LUBAC complex. Although all three proteins readily coimmunoprecipitate,

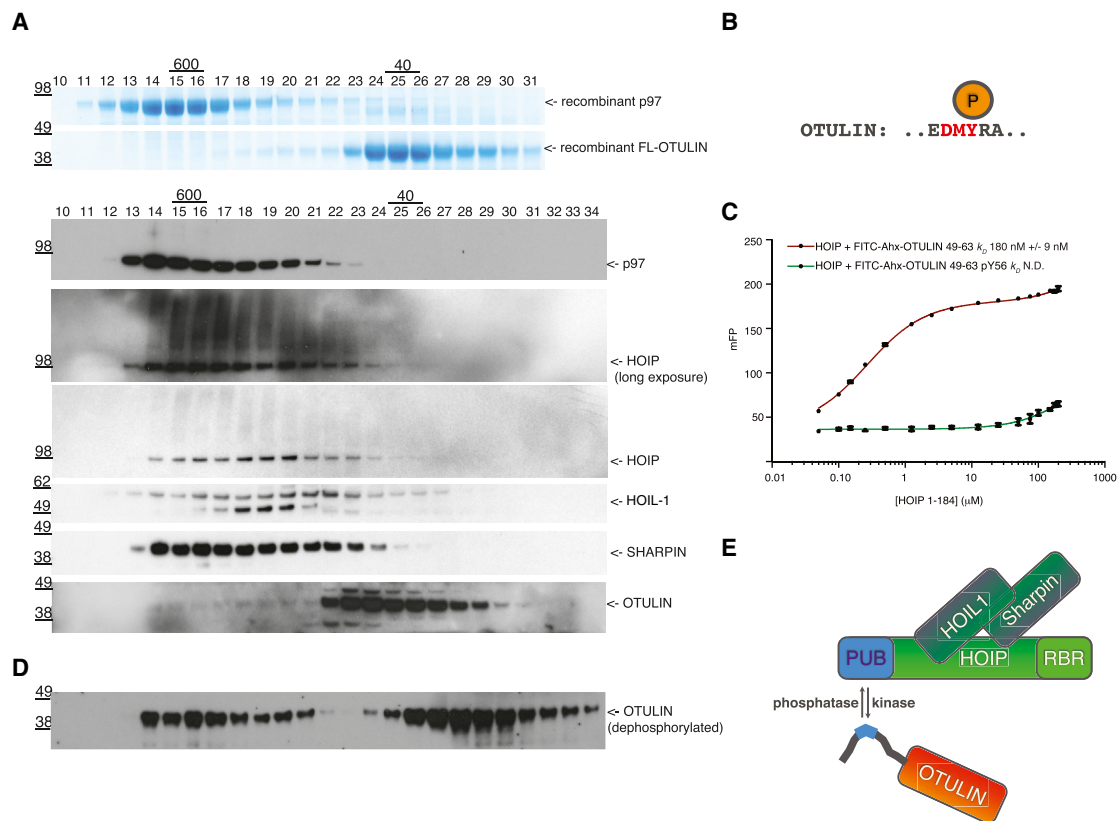

**Figure 7. Regulation of OTULIN-LUBAC Complex Formation by Phosphorylation**

(A) Gel filtration analysis of purified bacterial p97 hexamers and full-length OTULIN visualized by Coomassie staining and HEK293ET cell lysates probed with indicated antibodies.

(B) Schematic of the OTULIN PIM indicating phosphorylation at Tyr56 as identified in 22 independent mass spectrometry experiments in <http://phosphosite.org/proteinAction.do?id=2470471>.

(C) Fluorescence polarization assays of HOIP PUB domains with wild-type and Tyr56-phosphorylated FITC-Ahx-labeled OTULIN (49–67). Experiments were performed in triplicate, and errors represent SD from the mean.

(D) HEK293ET lysates were prepared in absence of phosphatase inhibitors and probed for the same components as in (A). Only the OTULIN blot is shown.

(E) Schematic model of the LUBAC-OTULIN complex indicating its regulation by protein phosphorylation.

suggesting a trimeric complex (see Emmerich et al., 2013), the gel filtration analysis does not exclude the presence of HOIP/HOIL-1 or HOIP/SHARPIN subcomplexes. Neither SHARPIN nor HOIL-1 can bind the PUB domain of HOIP (they contain one Tyr each and have no PIM), which would be free to interact with OTULIN or p97. We show that HOIP greatly favors OTULIN, and that p97 concentration must be rather high in order to compete with OTULIN if bound. However, given that p97 is a hexamer and HOIP is oligomeric, an interaction of complexes would most likely have improved binding properties.

Our study provides evidence that OTULIN regulates LUBAC-assembled Met1-polyUb through direct interaction with the HOIP PUB domain and that this might regulate LUBAC's signaling capacity. Moreover, we show that endogenous LUBAC can be part of the endogenous LUBAC complex; however, this is prevented by the phosphorylation of the OTULIN PIM Tyr residue. The involved protein kinase(s) and phosphatase(s) and the dynamics of this phosphorylation event need additional investigation. The regulation of PUB-PIM interactions by phosphorylation was previously shown also for p97, in which PIM

phosphorylation blocks PNGase interaction and affects endoplasmic-reticulum-associated protein degradation (Li et al., 2008). To fully understand the physiological consequences of the OTULIN-HOIP interaction, genetic models such as knockin animals or cell lines are required, and the dynamics of OTULIN phosphorylation need to be understood. Nonetheless, our characterization of OTULIN as a direct binding partner for LUBAC, and the realization that this interaction is regulated by phosphorylation, improves our understanding of the important Met1-polyUb-regulating machinery in cells and provides an elegant model as to how individual Ub chain types may be regulated by specific DUB-E3 pairs.

#### EXPERIMENTAL PROCEDURES

Additional details on all methods can be found in the [Supplemental Experimental Procedures](#).

#### Protein Expression and Purification

Proteins were expressed from pOPINB vectors in Rosetta2 (DE3) pLacI cells. For NMR studies, cells were grown in 2M9 medium supplemented



with  $^{15}\text{N}$   $\text{NH}_4\text{Cl}$  and/or  $^{13}\text{C}$  glucose. Proteins were purified by immobilized metal-affinity, anion-exchange, and size-exclusion chromatography.

#### Crystal Structure Analysis

Crystallization conditions were screened by the vapor diffusion method. Apo HOIP was determined by molecular replacement with SGC coordinates (PDB ID 4JUJ) as a search model. The HOIP-OTULIN PIM structure was determined by molecular replacement with the apo HOIP structure.

#### NMR Spectroscopy

Standard triple-resonance experiments (HNCA, HN(CO)CA, HNCACB, CBCA(CO)NH, and HBHA(CO)NH) were acquired for the assignment of HOIP resonances. Constant time  $^{13}\text{C}$  and  $^{13}\text{C}$ -HSQC were acquired for the methyl and aromatic regions. In addition, (HB)CB(CGCD)HD and (HB)CB(CGCDCE)HE experiments coupled the C $\beta$  of tyrosine resonances to the H $\delta$  and H $\epsilon$  positions of the tyrosine ring, respectively.

#### Fluorescence Polarization Binding Assays

Serially diluted PUB domains and HOIP variants were mixed with an equal volume of 100 nM FITC-Ahx-labeled peptides of OTULIN and p97. Fluorescence polarization was recorded on a PheraStar plate reader (BMG LABTECH) and fitted to a one-site binding model with GraphPad Prism 5.

#### Immunoprecipitation of HOIP-V5 and HA-OTULIN

Transfected HEK293T or U2OS and NOD2 cells were lysed in the presence of protease and phosphatase inhibitors. Clarified lysates were incubated overnight with anti-V5 and anti-HA-agarose resin.

#### Luciferase Reporter Assays

Cells were cotransfected with the NF $\kappa$ B luciferase reporter construct pBIXluc and the thymidine kinase-renailla luciferase construct in addition to other vectors used in the study. After 24 hr, cells were lysed in passive lysis buffer (Promega), and luciferase activity was recorded. Protein expression levels were determined by western blotting of cell lysates.

#### ACCESSION NUMBERS

Coordinates and structure factors have been deposited to the PDB under accession numbers 4OYJ (HOIP-PUB domain) and 4OYK (HOIP-PUB in complex with OTULIN PIM).

#### SUPPLEMENTAL INFORMATION

Supplemental Information contains Supplemental Experimental Procedures and eight figures and can be found with this article online at <http://dx.doi.org/10.1016/j.molcel.2014.03.018>.

#### ACKNOWLEDGMENTS

We would like to thank Mark Allen, Mark Bycroft, Trevor Rutherford, Garib Murshudov, Stephen McLaughlin, Chris Johnson, Andrew McKenzie (MRC LMB), Rasmus Hartmann-Petersen (University of Copenhagen), and members of the D.K. and M.G.-H. labs for advice, reagents, and critical comments on the manuscript. We would like to thank beamline staff at Diamond Light Source beamlines I02 and I04. This work was supported by the Medical Research Council (U105192732), the European Research Council (309756), the Lister Institute for Preventive Medicine, the EMBO Young Investigator Program (all D.K.), the Novo Nordisk Foundation (M.G.-H., S.V.N., B.K.F., and N.M.), the Lundbeck Foundation (S.V.N. and M.G.-H.), and a Steno Fellowship from the Danish Council for Independent Research (M.G.-H.). D.K. is a part of the DUB Alliance, which includes Cancer Research Technology and FORMA Therapeutics.

Received: September 18, 2013

Revised: January 23, 2014

Accepted: February 25, 2014

Published: April 10, 2014

#### REFERENCES

- Allen, M.D., Buchberger, A., and Bycroft, M. (2006). The PUB domain functions as a p97 binding module in human peptide N-glycanase. *J. Biol. Chem.* *281*, 25502–25508.
- Behrends, C., and Harper, J.W. (2011). Constructing and decoding unconventional ubiquitin chains. *Nat. Struct. Mol. Biol.* *18*, 520–528.
- Boisson, B., Laplantine, E., Prando, C., Gilliani, S., Israelsson, E., Xu, Z., Abhyankar, A., Israël, L., Trevejo-Nunez, G., Bogunovic, D., et al. (2012). Immunodeficiency, autoinflammation and amylopectinosis in humans with inherited HOIL-1 and LUBAC deficiency. *Nat. Immunol.* *13*, 1178–1186.
- Chen, Z.J., and Sun, L.J. (2009). Nonproteolytic functions of ubiquitin in cell signaling. *Mol. Cell* *33*, 275–286.
- Emmerich, C.H., Ordureau, A., Strickson, S., Arthur, J.S.C., Pedrioli, P.G.A., Komander, D., and Cohen, P. (2013). Activation of the canonical IKK complex by K63/M1-linked hybrid ubiquitin chains. *Proc. Natl. Acad. Sci. USA* *110*, 15247–15252.
- Faesen, A.C., Luna-Vargas, M.P.A., Geurink, P.P., Clerici, M., Merckx, R., van Dijk, W.J., Hameed, D.S., El Oualid, F., Ovaas, H., and Sixma, T.K. (2011). The differential modulation of USP activity by internal regulatory domains, interactors and eight ubiquitin chain types. *Chem. Biol.* *18*, 1550–1561.
- Fiil, B.K., Damgaard, R.B., Wagner, S.A., Keusekotten, K., Fritsch, M., Bekker-Jensen, S., Mailand, N., Choudhary, C., Komander, D., and Gyrd-Hansen, M. (2013). OTULIN restricts Met1-linked ubiquitination to control innate immune signaling. *Mol. Cell* *50*, 818–830.
- Fu, B., Li, S., Wang, L., Berman, M.A., and Dorf, M.E. (2014). The ubiquitin conjugating enzyme UBE2L3 regulates TNF $\alpha$ -induced linear ubiquitination. *Cell Res.* *24*, 376–379.
- Gerlach, B., Cordier, S.M., Schmukle, A.C., Emmerich, C.H., Rieser, E., Haas, T.L., Webb, A.I., Rickard, J.A., Anderton, H., Wong, W.W.-L., et al. (2011). Linear ubiquitination prevents inflammation and regulates immune signalling. *Nature* *471*, 591–596.
- Haas, T.L., Emmerich, C.H., Gerlach, B., Schmukle, A.C., Cordier, S.M., Rieser, E., Feltham, R., Vince, J., Warnken, U., Wenger, T., et al. (2009). Recruitment of the linear ubiquitin chain assembly complex stabilizes the TNF-R1 signaling complex and is required for TNF-mediated gene induction. *Mol. Cell* *36*, 831–844.
- Hayes, S.D., Liu, H., MacDonald, E., Sanderson, C.M., Coulson, J.M., Clague, M.J., and Urbé, S. (2012). Direct and indirect control of mitogen-activated protein kinase pathway-associated components, BRAP/IMP E3 ubiquitin ligase and CRAF/RAF1 kinase, by the deubiquitylating enzyme USP15. *J. Biol. Chem.* *287*, 43007–43018.
- Hershko, A., and Ciechanover, A. (1998). The ubiquitin system. *Annu. Rev. Biochem.* *67*, 425–479.
- Ikeda, F., Deribe, Y.L., Skånland, S.S., Stieglitz, B., Grabbe, C., Franz-Wachtel, M., van Wijk, S.J.L., Goswami, P., Nagy, V., Terzic, J., et al. (2011). SHARPIN forms a linear ubiquitin ligase complex regulating NF- $\kappa$ B activity and apoptosis. *Nature* *471*, 637–641.
- Kamiya, Y., Uekusa, Y., Sumiyoshi, A., Sasakawa, H., Hirao, T., Suzuki, T., and Kato, K. (2012). NMR characterization of the interaction between the PUB domain of peptide:N-glycanase and ubiquitin-like domain of HR23. *FEBS Lett.* *586*, 1141–1146.
- Kern, M., Fernandez-Sáiz, V., Schäfer, Z., and Buchberger, A. (2009). UBXD1 binds p97 through two independent binding sites. *Biochem. Biophys. Res. Commun.* *380*, 303–307.
- Keusekotten, K., Elliott, P.R., Glockner, L., Fiil, B.K., Damgaard, R.B., Kulathu, Y., Wauer, T., Hospenthal, M.K., Gyrd-Hansen, M., Krappmann, D., et al. (2013). OTULIN antagonizes LUBAC signaling by specifically hydrolyzing Met1-linked polyubiquitin. *Cell* *153*, 1312–1326.
- Kirisako, T., Kamei, K., Murata, S., Kato, M., Fukumoto, H., Kanie, M., Sano, S., Tokunaga, F., Tanaka, K., and Iwai, K. (2006). A ubiquitin ligase complex assembles linear polyubiquitin chains. *EMBO J.* *25*, 4877–4887.

- Komander, D., and Rape, M. (2012). The ubiquitin code. *Annu. Rev. Biochem.* *81*, 203–229.
- Komander, D., Reyes-Turcu, F., Licchesi, J.D.F., Odenwaelder, P., Wilkinson, K.D., and Barford, D. (2009). Molecular discrimination of structurally equivalent Lys 63-linked and linear polyubiquitin chains. *EMBO Rep.* *10*, 466–473.
- Kraft, C., Kijanska, M., Kalie, E., Siergiejuk, E., Lee, S.S., Semplicio, G., Stoffel, I., Brezovich, A., Verma, M., Hansmann, I., et al. (2012). Binding of the Atg1/ULK1 kinase to the ubiquitin-like protein Atg8 regulates autophagy. *EMBO J.* *31*, 3691–3703.
- Kulathu, Y., and Komander, D. (2012). Atypical ubiquitylation - the unexplored world of polyubiquitin beyond Lys48 and Lys63 linkages. *Nat. Rev. Mol. Cell Biol.* *13*, 508–523.
- Li, M., Brooks, C.L., Kon, N., and Gu, W. (2004). A dynamic role of HAUSP in the p53-Mdm2 pathway. *Mol. Cell* *13*, 879–886.
- Li, G., Zhao, G., Schindelin, H., and Lennarz, W.J. (2008). Tyrosine phosphorylation of ATPase p97 regulates its activity during ERAD. *Biochem. Biophys. Res. Commun.* *375*, 247–251.
- Mevissen, T.E.T., Hospenthal, M.K., Geurink, P.P., Elliott, P.R., Akutsu, M., Arnaudo, N., Ekkebus, R., Kulathu, Y., Wauer, T., El Oualid, F., et al. (2013). OTU deubiquitinases reveal mechanisms of linkage specificity and enable ubiquitin chain restriction analysis. *Cell* *154*, 169–184.
- Meyer, H., Bug, M., and Bremer, S. (2012). Emerging functions of the VCP/p97 AAA-ATPase in the ubiquitin system. *Nat. Cell Biol.* *14*, 117–123.
- Rivkin, E., Almeida, S.M., Ceccarelli, D.F., Juang, Y.-C., MacLean, T.A., Srikumar, T., Huang, H., Dunham, W.H., Fukumura, R., Xie, G., et al. (2013). The linear ubiquitin-specific deubiquitinase gumbly regulates angiogenesis. *Nature* *498*, 318–324.
- Smit, J.J., Monteferrario, D., Noordermeer, S.M., van Dijk, W.J., van der Reijden, B.A., and Sixma, T.K. (2012). The E3 ligase HOIP specifies linear ubiquitin chain assembly through its RING-IBR-RING domain and the unique LDD extension. *EMBO J.* *31*, 3833–3844.
- Solyom, Z., Schwarten, M., Geist, L., Konrat, R., Willbold, D., and Brutscher, B. (2013). BEST-TROSY experiments for time-efficient sequential resonance assignment of large disordered proteins. *J. Biomol. NMR* *55*, 311–321.
- Stieglitz, B., Haire, L.F., Dikic, I., and Rittinger, K. (2012a). Structural analysis of SHARPIN, a subunit of a large multi-protein E3 ubiquitin ligase, reveals a novel dimerization function for the pleckstrin homology superfold. *J. Biol. Chem.* *287*, 20823–20829.
- Stieglitz, B., Morris-Davies, A.C., Koliopoulos, M.G., Christodoulou, E., and Rittinger, K. (2012b). LUBAC synthesizes linear ubiquitin chains via a thioester intermediate. *EMBO Rep.* *13*, 840–846.
- Stieglitz, B., Rana, R.R., Koliopoulos, M.G., Morris-Davies, A.C., Schaeffer, V., Christodoulou, E., Howell, S., Brown, N.R., Dikic, I., and Rittinger, K. (2013). Structural basis for ligase-specific conjugation of linear ubiquitin chains by HOIP. *Nature* *503*, 422–426.
- Suzuki, T., Park, H., Till, E.A., and Lennarz, W.J. (2001). The PUB domain: a putative protein-protein interaction domain implicated in the ubiquitin-proteasome pathway. *Biochem. Biophys. Res. Commun.* *287*, 1083–1087.
- Tokunaga, F., and Iwai, K. (2012). LUBAC, a novel ubiquitin ligase for linear ubiquitination, is crucial for inflammation and immune responses. *Microbes Infect.* *14*, 563–572.
- Tokunaga, F., Nakagawa, T., Nakahara, M., Saeki, Y., Taniguchi, M., Sakata, S.-I., Tanaka, K., Nakano, H., and Iwai, K. (2011). SHARPIN is a component of the NF- $\kappa$ B-activating linear ubiquitin chain assembly complex. *Nature* *471*, 633–636.
- Walczak, H., Iwai, K., and Dikic, I. (2012). Generation and physiological roles of linear ubiquitin chains. *BMC Biol.* *10*, 23.
- Yagi, H., Ishimoto, K., Hiromoto, T., Fujita, H., Mizushima, T., Uekusa, Y., Yagi-Utsumi, M., Kurimoto, E., Noda, M., Uchiyama, S., et al. (2012). A non-canonical UBA-UBL interaction forms the linear-ubiquitin-chain assembly complex. *EMBO Rep.* *13*, 462–468.
- Zhao, G., Zhou, X., Wang, L., Li, G., Schindelin, H., and Lennarz, W.J. (2007). Studies on peptide:N-glycanase-p97 interaction suggest that p97 phosphorylation modulates endoplasmic reticulum-associated degradation. *Proc. Natl. Acad. Sci. USA* *104*, 8785–8790.

**Molecular Cell, Volume 53**

**Supplemental Information**

**Molecular Basis and Regulation  
of OTULIN-LUBAC Interaction**

**Paul R. Elliott, Sofie V. Nielsen, Paola Marco-Casanova, Berthe Katrine Fiil,  
Kirstin Keusekotten, Niels Mailand, Stefan M.V. Freund, Mads Gyrd-Hansen,  
and David Komander**

A

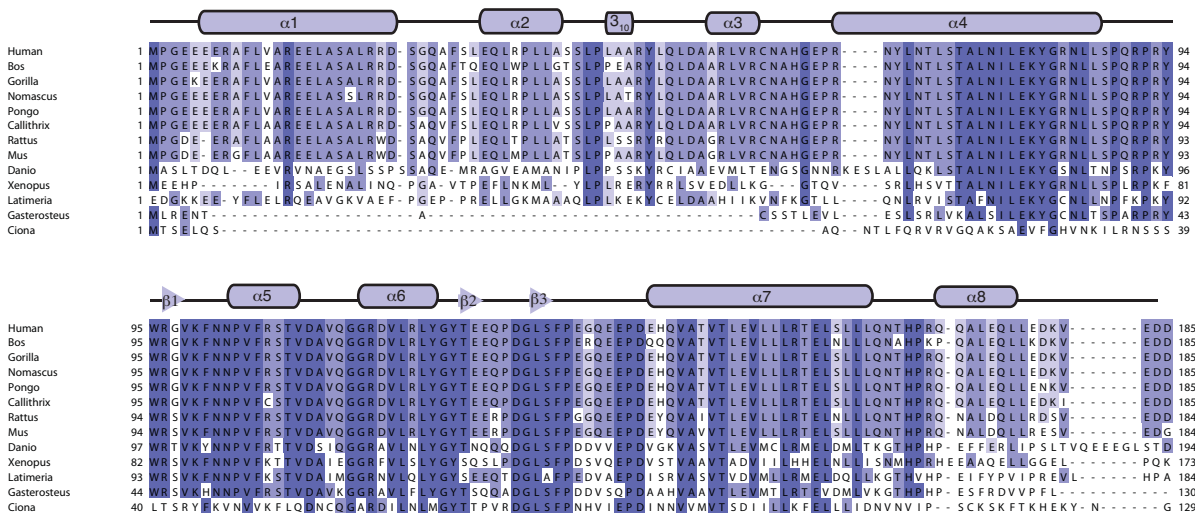

B

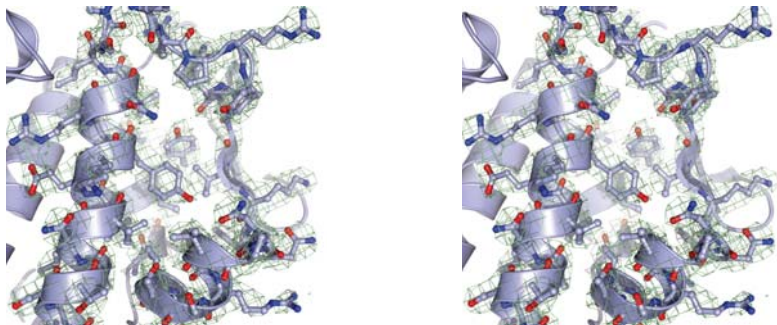

C

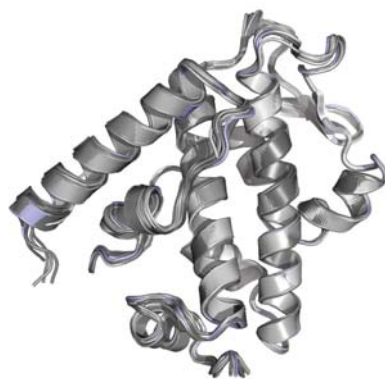

D

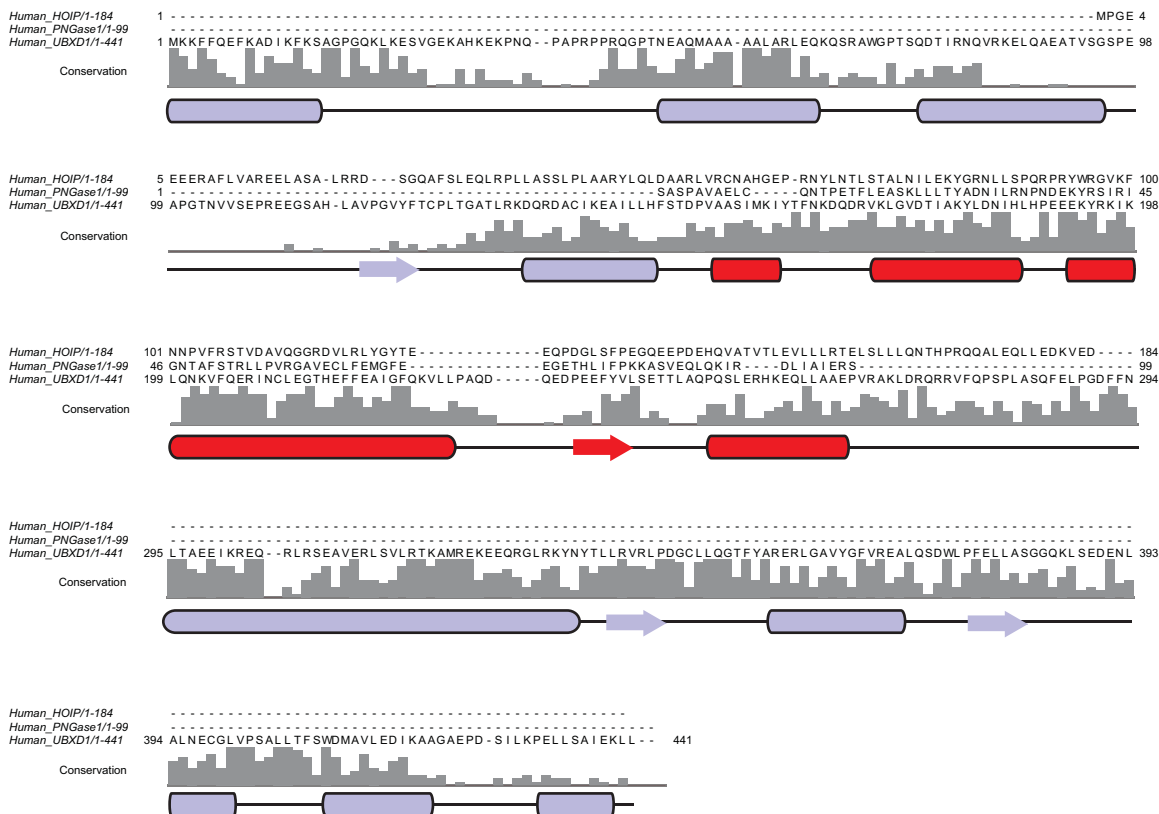



### **Supplementary Figure 1 (linked to Figure 1)**

A) Multiple sequence alignment of HOIP PUB domain orthologs, extracted from the Ensemble Genome Browser. Secondary structure annotations corresponding to the HOIP PUB domain structure are shown above the sequence alignment. B) Cross-eyed stereo pair of apo HOIP showing residues around the PIM pocket. Residues are shown in ball and stick representation enclosed in a weighted  $2|Fo|-|Fc|$  map contoured at  $1 \sigma$ . C) Superimposition of the 13 HOIP PUB domain molecules observed within the asymmetric unit of the apo HOIP PUB domain structure. All chains superimpose with low RMSDs (0.9-1.2 Å). D) UBXD1 PUB domain does not contain an N-terminal extension as found in HOIP PUB domain. Sequence alignment of the HOIP and PNGase PUB domains onto UBXD1 full-length sequence. Sequence conservation of UBXD1 orthologs is shown as bar graphs. Predicted secondary structure elements for human UBXD1 are shown. The region corresponding to the annotated PUB domain is colored in red. In UBXD1 there is an area of low conservation N-terminal to the annotated PUB domain, suggesting lack of any conserved N-terminal domain, in contrast to the HOIP PUB domain.

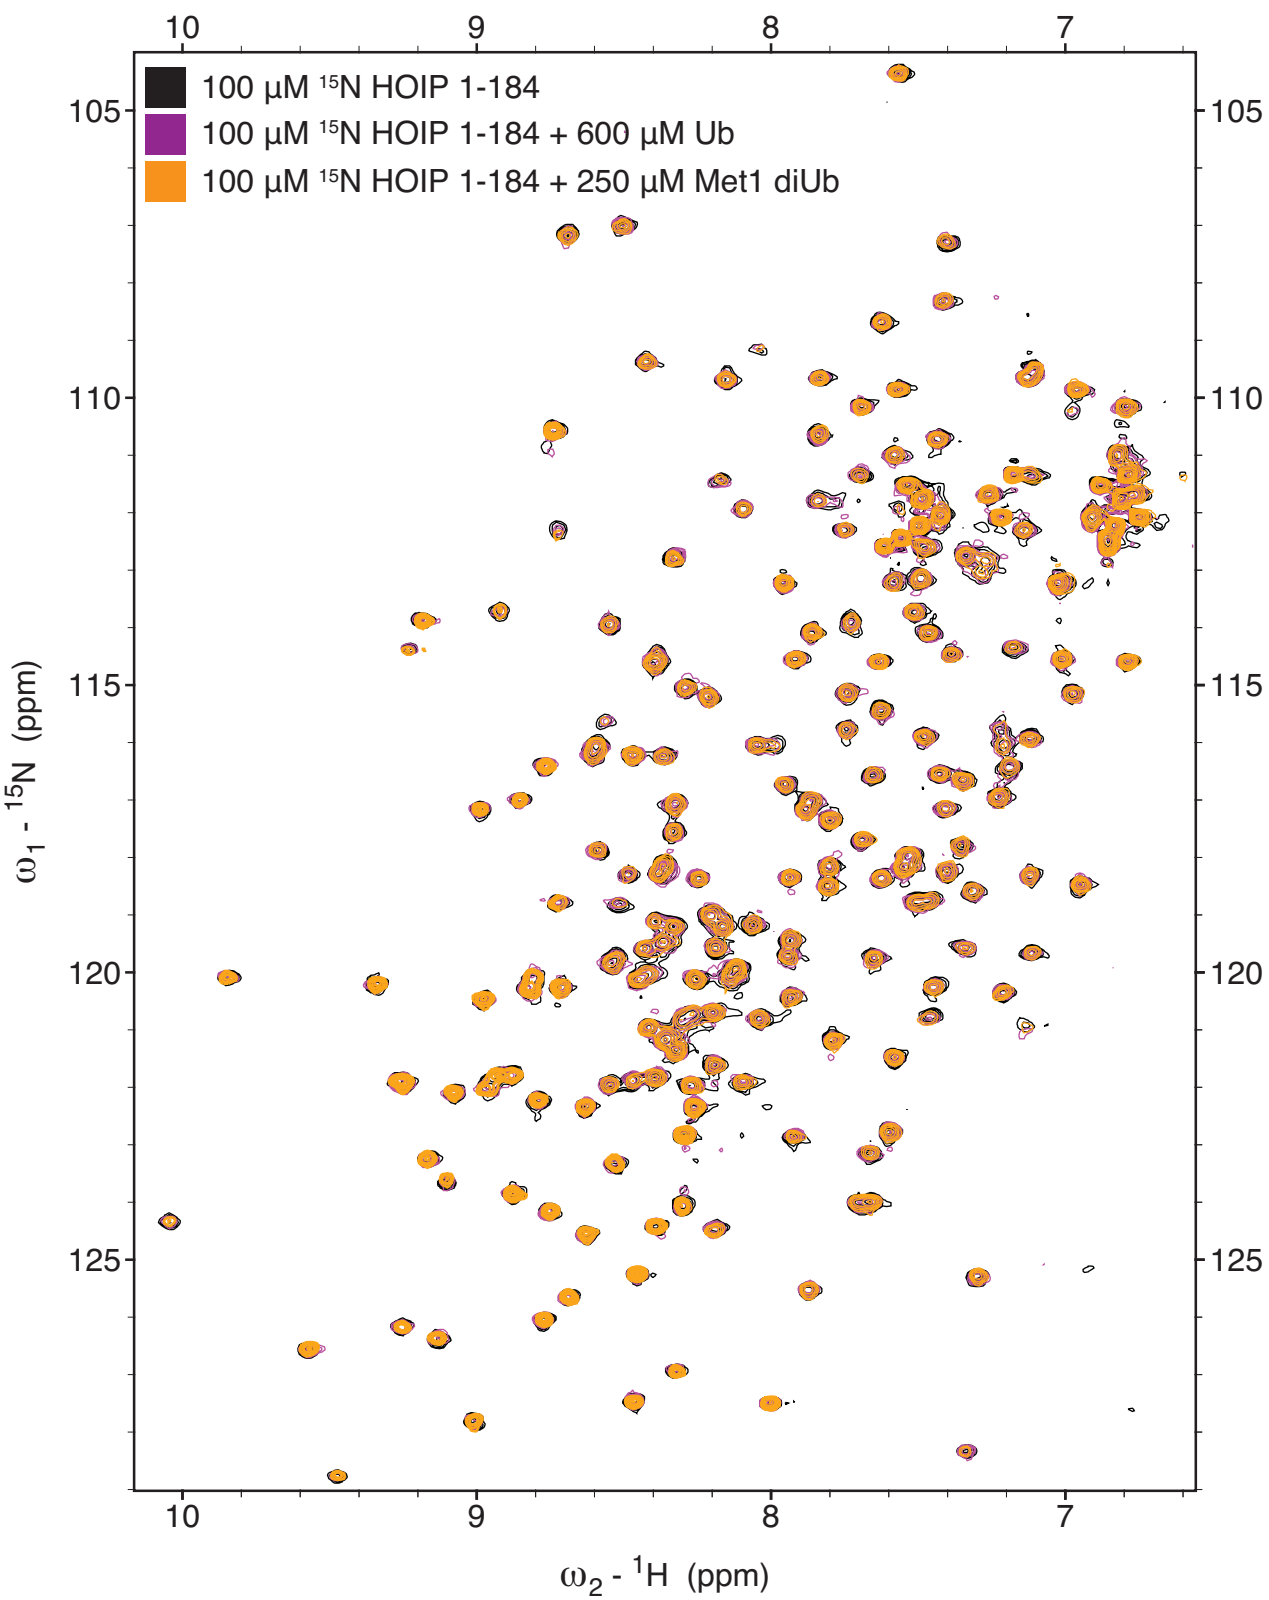

**Supplementary Figure 2 (linked to Figure 2A, B)**

Heteronuclear Single Quantum Correlation (HSQC) spectra of  $^{15}\text{N}$ -labeled HOIP (aa 1-184) (black) with six molar excess of ubiquitin (magenta) or two and a half molar excess of Met1-diUb (orange) are shown. No chemical shift perturbations were observed upon addition of Ub or Met1-diUb, suggesting that the HOIP PUB domain does not contain a Ub interaction surface, in contrast to PNGase (Kamiya et al., 2012).

A

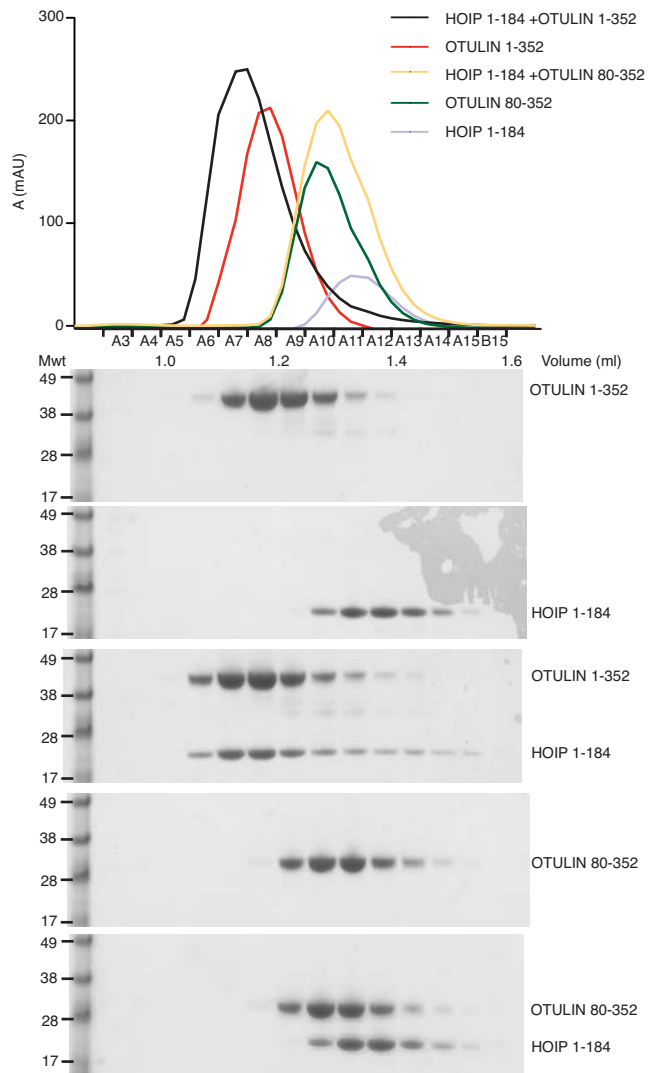

B

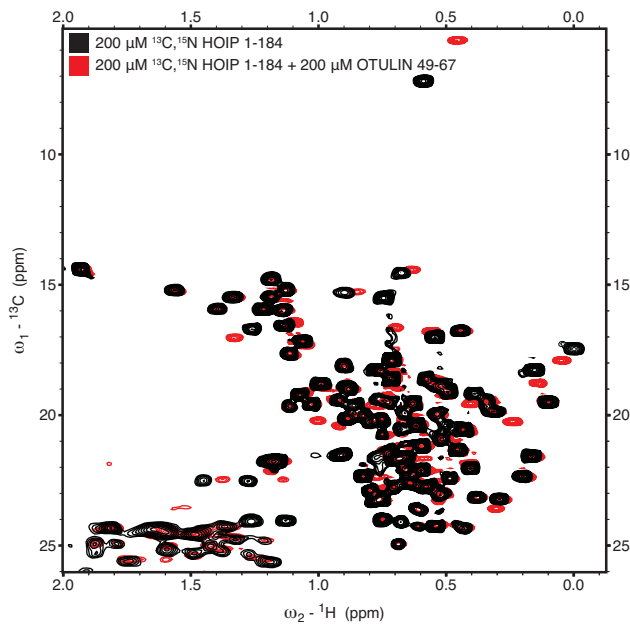



**Supplementary Figure 3 (linked to Figure 2C-G)**

A) Analytical size exclusion chromatography profile of the HOIP 1-184 (blue), full-length OTULIN 1-352 (red), 1.2:1 complex of HOIP 1-184 and OTULIN 1-352 (black) (as shown in **Figure 1E**). OTULIN catalytic domain 80-352 (green) and OTULIN 80-352 mixed with HOIP 1-184 in a 1:1 molar ratio (yellow).

Coomassie-stained SDS-PAGE gels are shown below for the protein-containing fractions. B) Aliphatic-region of  $^{13}\text{C}$ -HSQC spectra for HOIP 1-184 (black) and HOIP-1-184 in a 1:1 complex with OTULIN PIM 49-67 (red). In contrast to the  $^{15}\text{N}$ -BEST TROSY experiments, only a small subset of chemical shift perturbations are observed upon OTULIN PIM binding. This is in agreement with a small interacting region on the HOIP PUB domain, consistent with the HOIP-OTULIN PIM crystal structure.

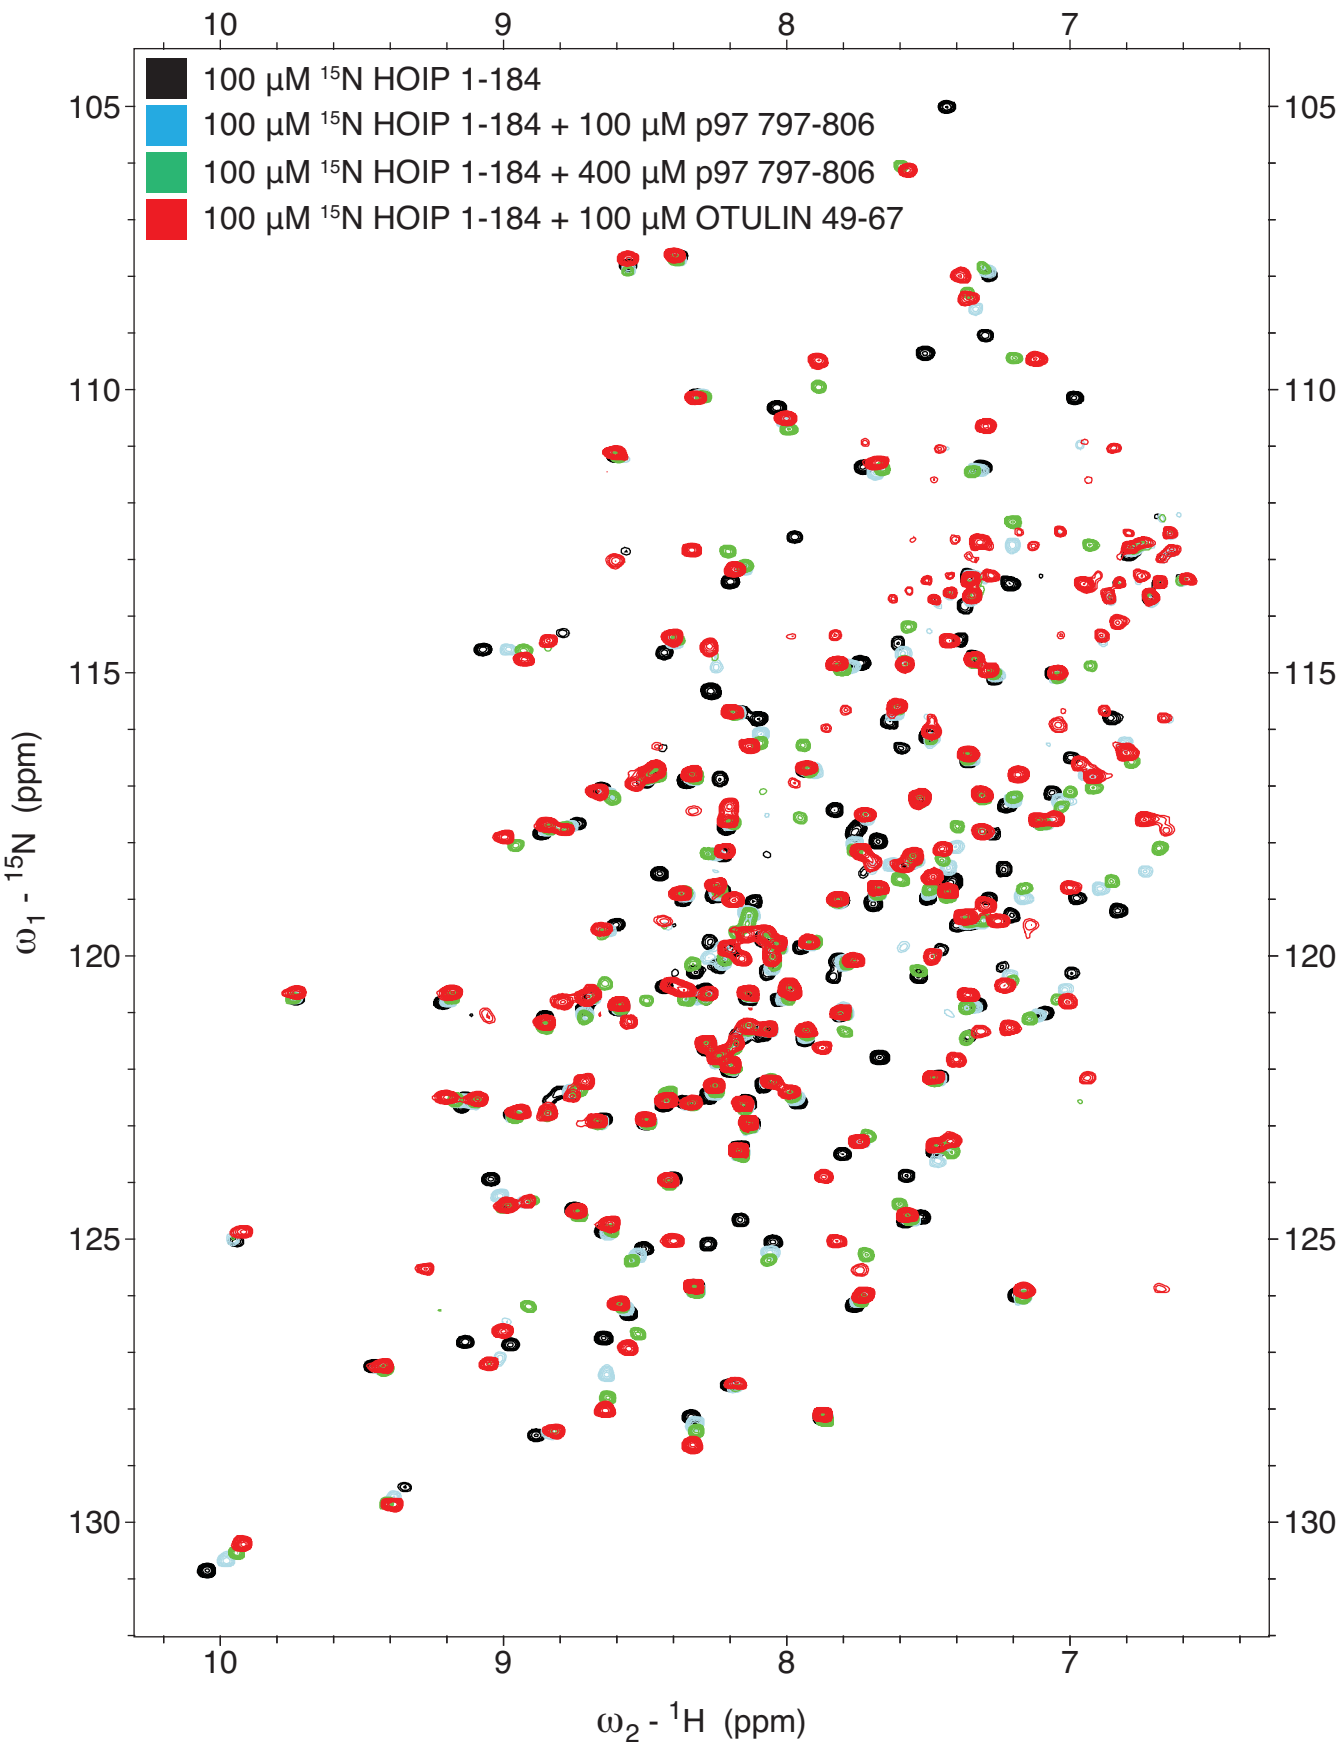

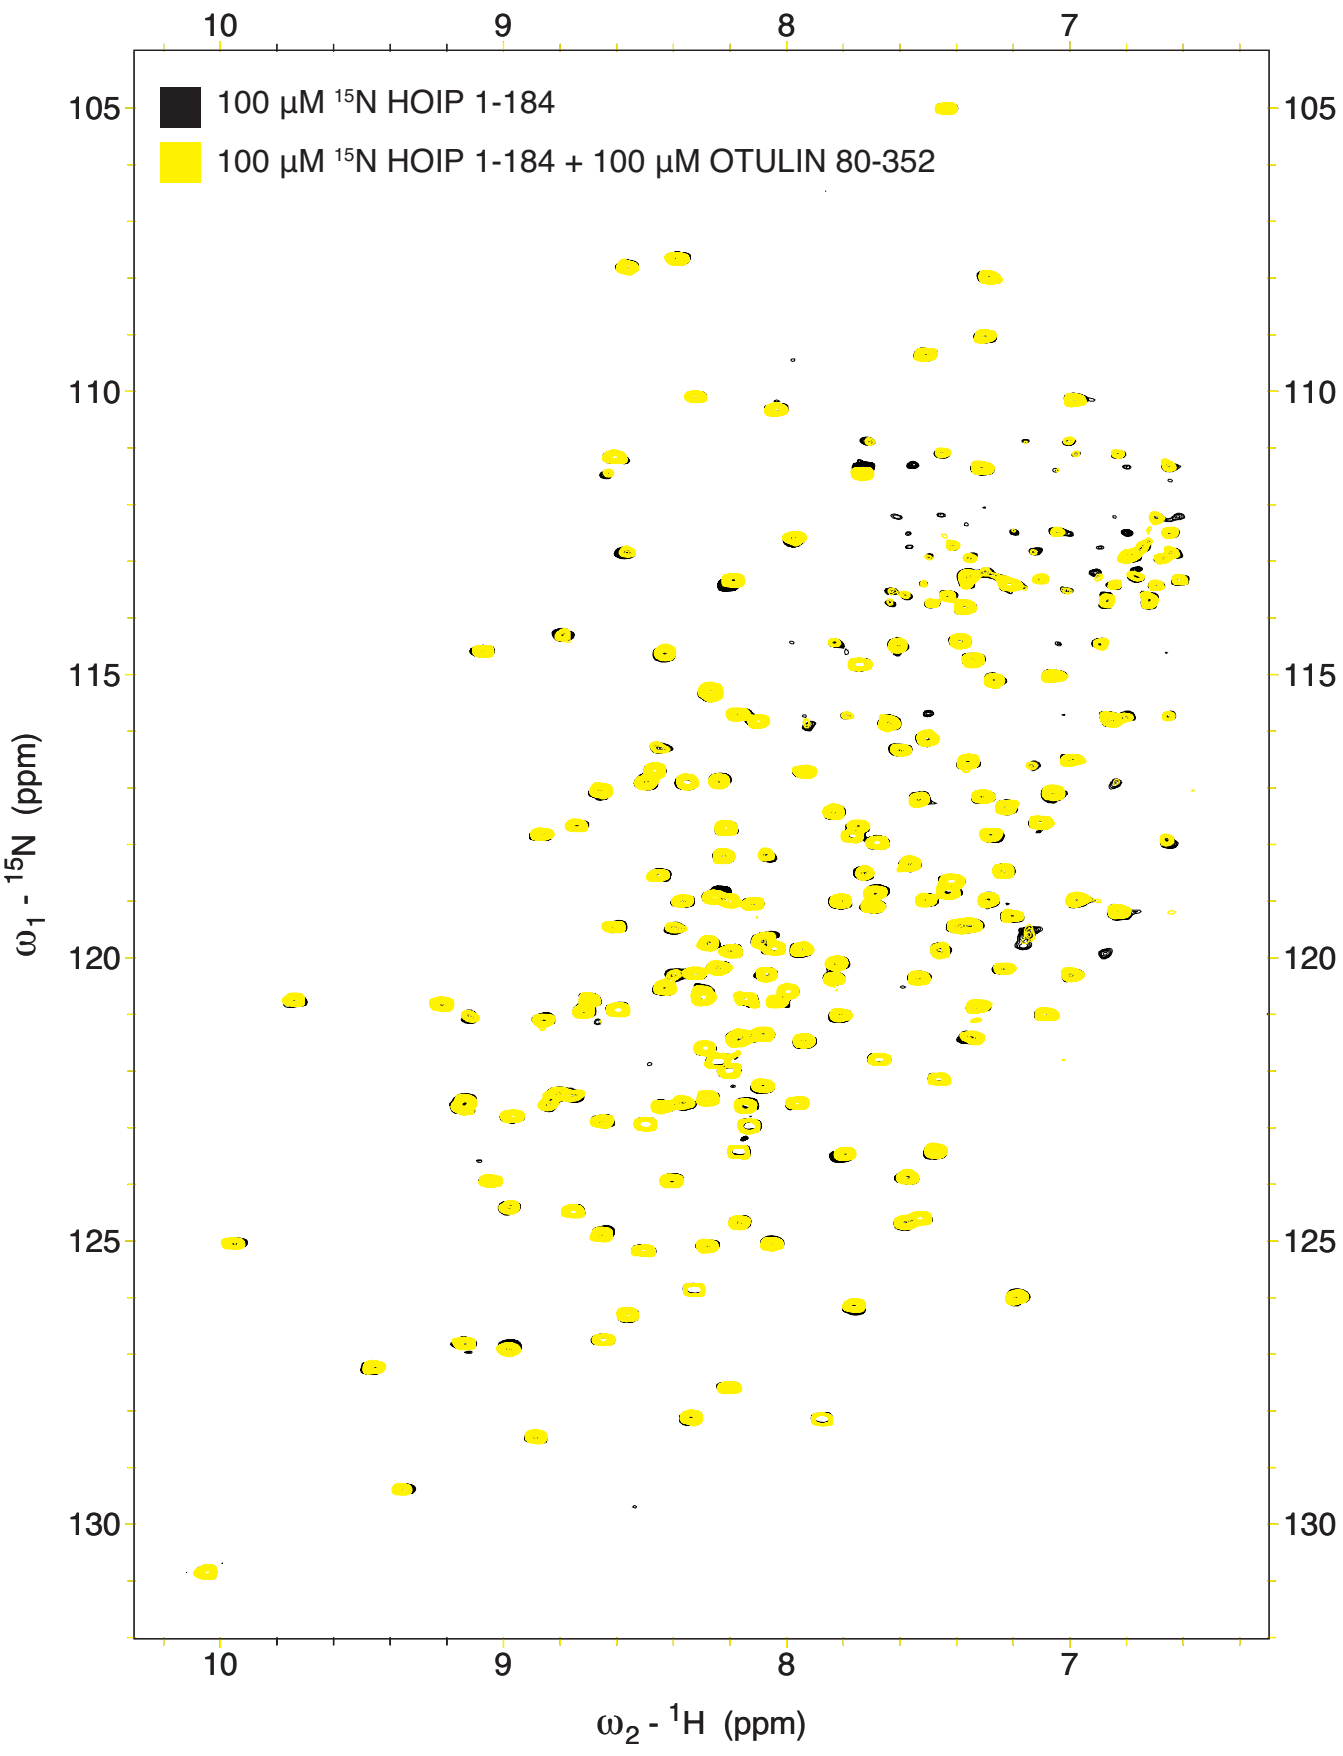

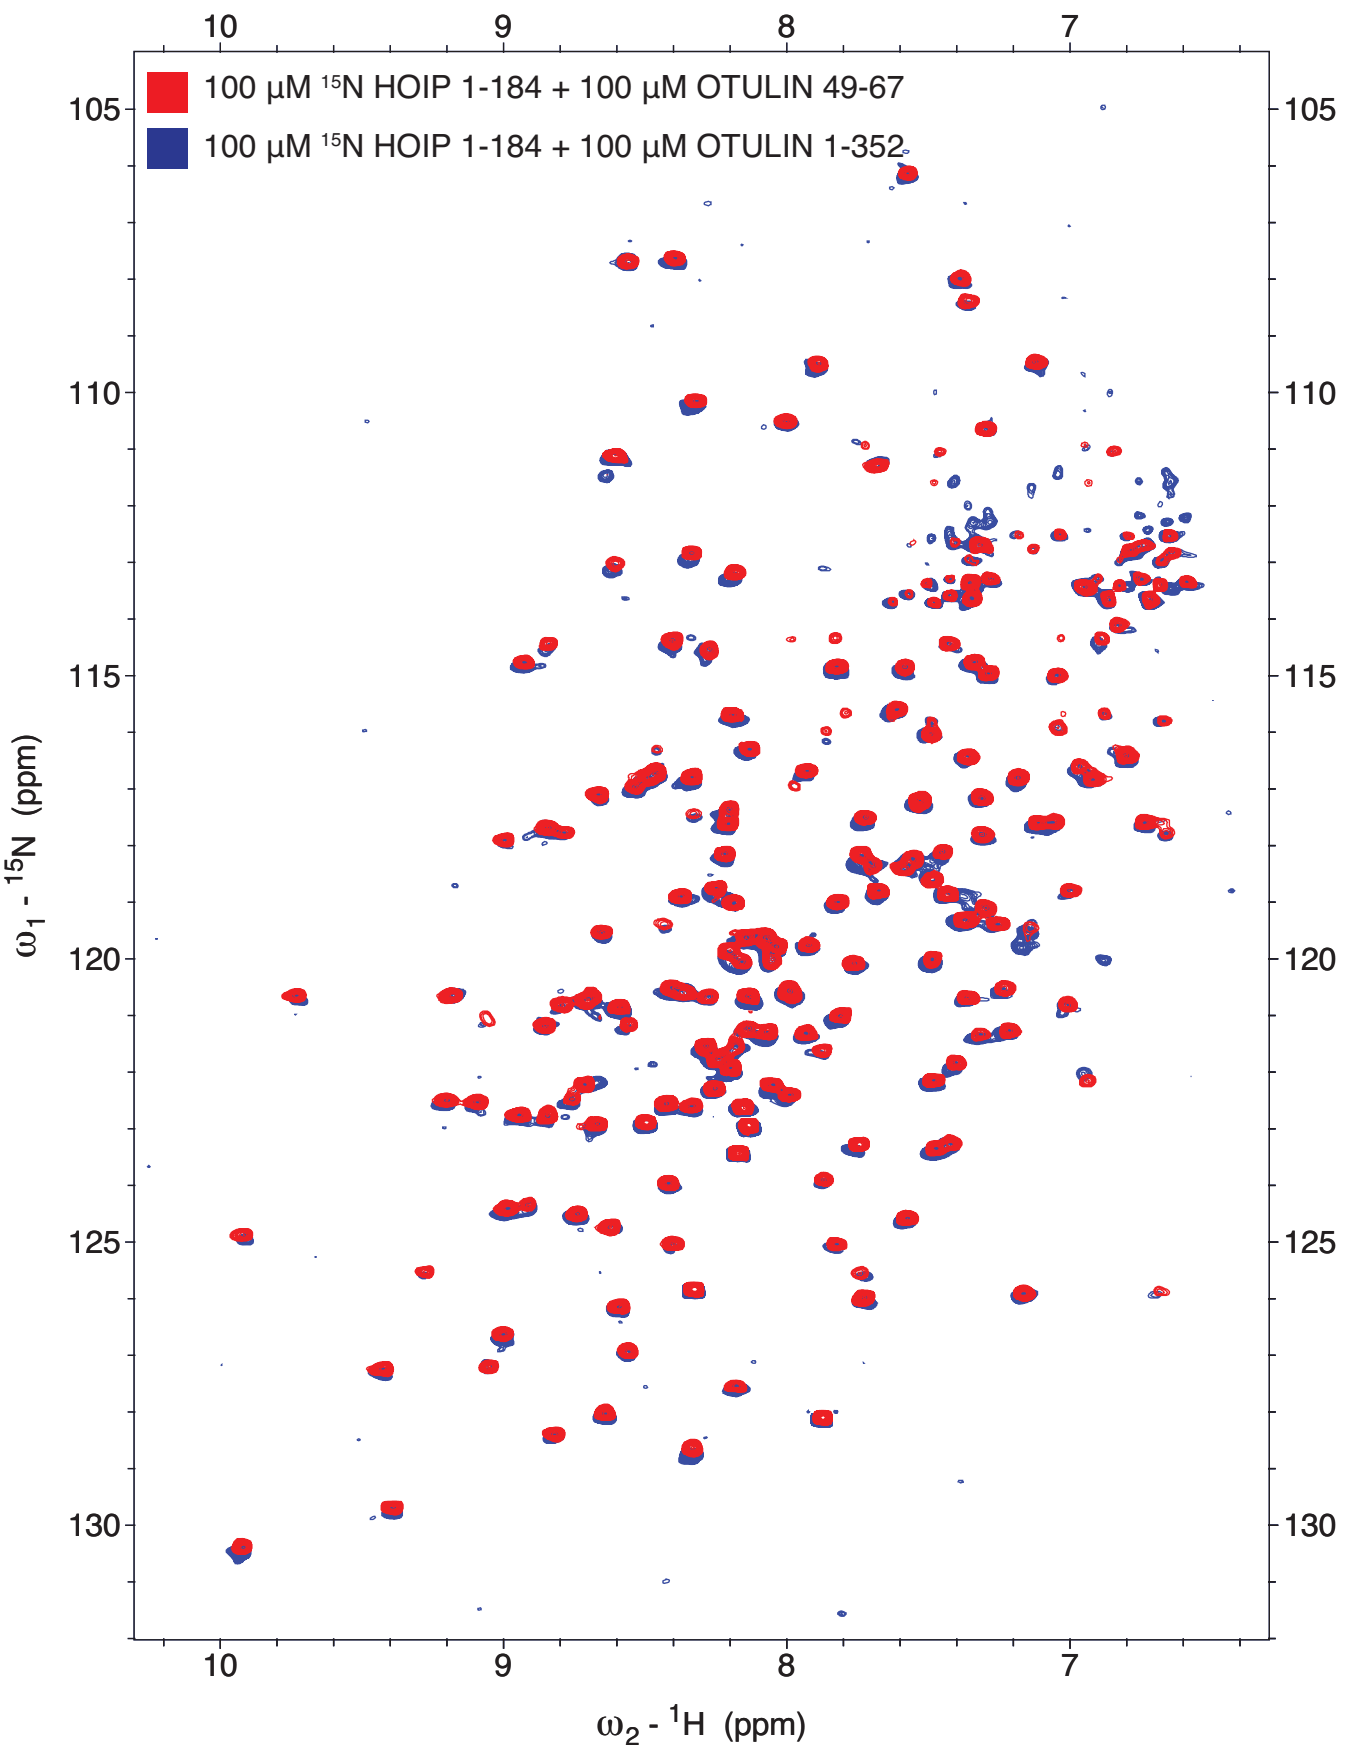

**Supplementary Figure 4 (linked to Figure 2G-J)**

$^{15}\text{N}$ -BEST TROSY spectra for A)  $^{15}\text{N}$ -labeled HOIP (black) mixed with an equimolar amount (blue) or four fold excess (green) of unlabeled p97 peptide, or mixed with an equimolar amount of OTULIN peptide (red). B)  $^{15}\text{N}$ -labeled HOIP (black) mixed with an equimolar amount of unlabeled OTULIN OTU domain (yellow). C)  $^{15}\text{N}$ -labeled HOIP mixed with an equimolar amount of unlabeled OTULIN peptide (red) or full-length OTULIN (blue).

A

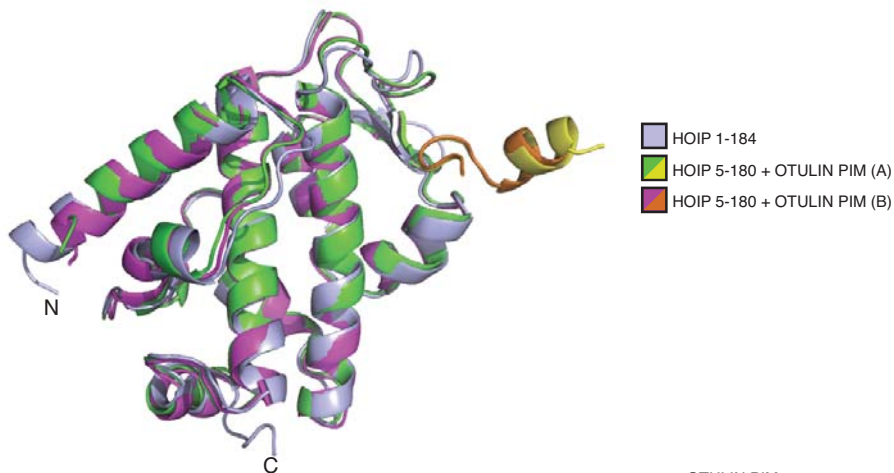

B

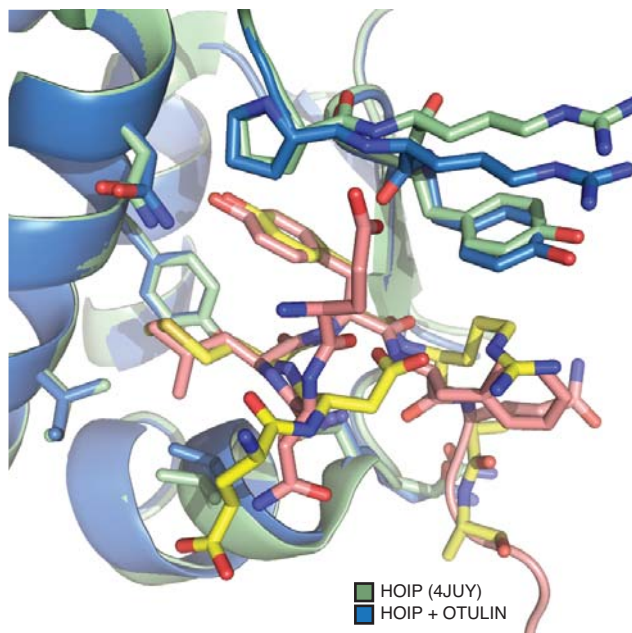

OTULIN PIM

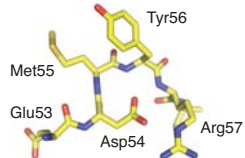

TEV Protease site

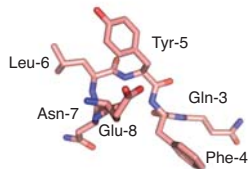

Superposition

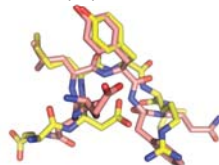



### **Supplementary Figure 5 (linked to Figure 3)**

A) Superimposition of the HOIP-OTULIN PIM complex from the asymmetric unit (green PUB domain with yellow OTULIN PIM, and magenta PUB with orange OTULIN PIM) onto apo HOIP (light blue). Two molecules of the HOIP-OTULIN PIM complex are observed in the asymmetric unit and shown superimposed onto each other with low RMSD (1.01 Å), both superimpose well onto the apo HOIP with an RMSD of 1.51 Å. B) Superimposition of the HOIP PUB domain (blue) with the HOIP PUB domain determined by the SGC (pdb-id 4juy, green). In both structures Tyr94 is flipped out, compared to apo HOIP structure where it partially occludes the PIM binding site. The SGC structure was crystallized with the His6 tag present. The TEV site forms a putative PIM (EDLYQ) (red) compared to the OTULIN PIM (DEMYR) (yellow) and superimpose well (right). In the SGC HOIP structure, the putative PIM from the TEV site in the symmetry-related molecule packs against the OTULIN PIM binding site on HOIP, resulting in Tyr94 being stabilized as in the holo state.

A

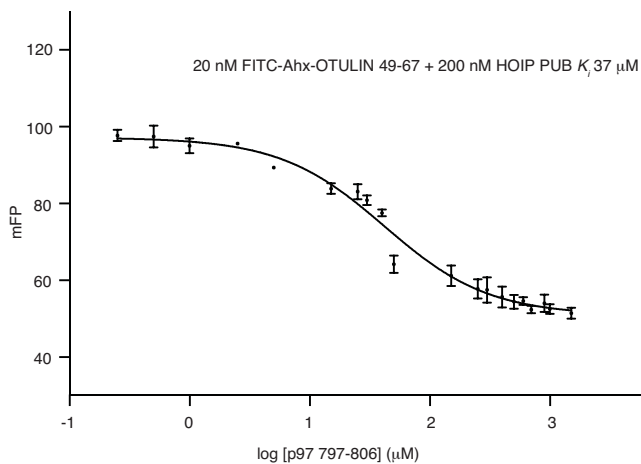

B

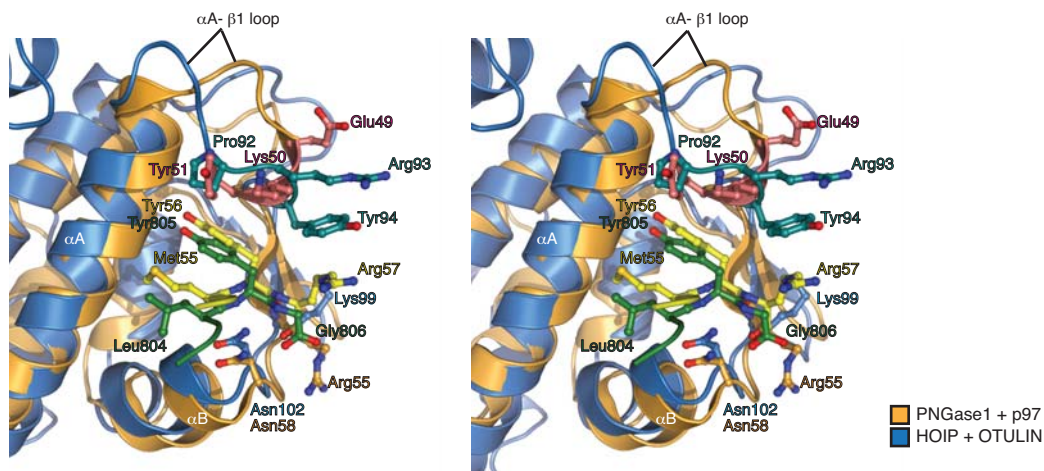

### **Supplementary Figure 6 (linked to Figure 4)**

A) Competition assay using fluorescent OTULIN PIM (49-67) and unlabeled p97 PIM (797-806). Wells containing fixed concentration of HOIP (200  $\mu$ M) bound to 20 nM FITC-Ahx OTULIN PIM are mixed with varying concentrations of unlabeled p97 PIM and the decrease in fluorescent polarization is monitored. Experiments were performed in triplicate and errors represent standard deviation from the mean. The data is fitted against a one-site model for determining  $K_i$  in GraphPad Prism. B) Cross-eyed stereo pair of the superimposed HOIP and PNGase PUB domains. The OTULIN PIM peptide sits deeper into the HOIP PIM pocket, relative to the p97 PIM peptide bound to PNGase.

# Supplementary Figure 7

A

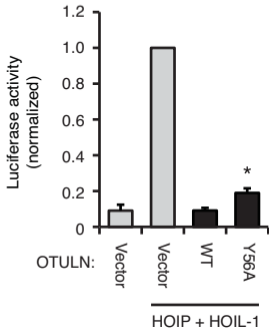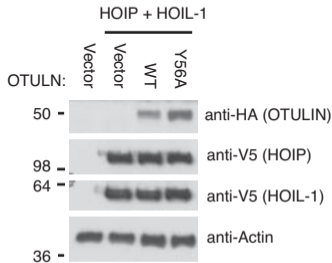

**Supplementary Figure 7 (linked to Figure 6)**

A) NF $\kappa$ B reporter assay performed as in **Figure 6D** for OTULIN Y56A PIM mutant co-transfected in HEK293T cells with epitope-tagged HOIP and HOIL1. Luciferase reporter activity for the OTULIN Y56A PIM was marginally greater than that of transfected wt OTULIN. *Right*, corresponding Western-Blot analysis of the assay.



**A**

U2OS

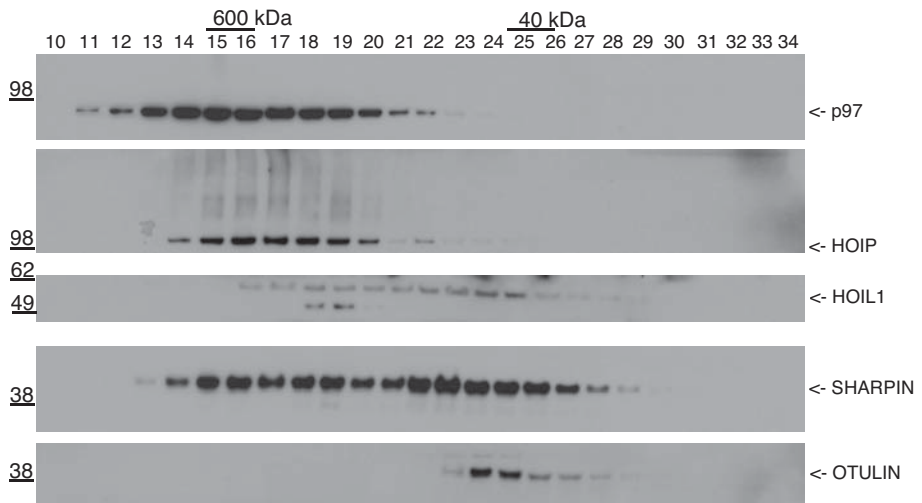**B**

RPE1

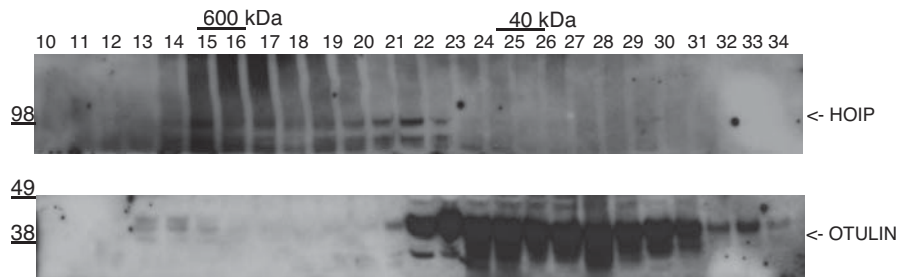

**Supplementary Figure 8 (linked to Figure 7)**

A) Gel filtration analysis of unstimulated U2OS cells, performed as in **Figure 7A**. B) Gel filtration analysis of human primary retinal pigment epithelial cells (RPE1), blotted for HOIP and OTULIN.

## Supplementary Experimental Procedures

### Sequence analysis

Multiple alignment analysis was performed with ClustalX. For sequences of the OTULIN N-terminal region used for analysis, see Supporting Information. Species abbreviations are as follows: Hs (*Homo sapiens*), Mam (*Macaca mulatta*), Mm (*Mus musculus*), Clf (*Canis lupus familiaris*), Fc (*Felis catus*), Bt (*Bos taurus*), Eq (*Equus caballus*), Ss (*Sus scrofa*), Tg (*Taeniopygia guttata*), Sas (*Salmo salar*), Dr (*Danio rerio*), Xt (*Xenopus tropicalis*), Dm (*Drosophila melanogaster*) Ce (*Caenorhabditis elegans*), Sc (*Saccharomyces cerevisiae*).

### Molecular biology

pcDNA3-HOIP-V5/His, pcDNA3-HOIP $\Delta$ PUB+ZnF-V5/His and pcDNA3-HOIL-1-V5/His were generously supplied by Prof. Henning Walczak (University College London, London, UK). The NF $\kappa$ B luciferase reporter plasmids, pBIIX-Luc and TK-renilla-Luc have been described previously (Gyrd-Hansen et al., 2008). HOIP-PUB (amino acid residues 1-185) and HOIP-PUB+ZnF (amino acid residues 1-436) fragments were amplified by PCR using the following primers AAAGGTACCATGCCGGGGGAGGAAGAGG / AACTCGAGATCATCTTCAACCTTGTCTTCC and AAAAAGCTTGATGCCGGGGGAGGAAGAGG / AATCTAGAACTAGTCCGGTTGCACATAAC, and were inserted into pcDNA3-V5/His-A. The Glutathione-S-transferase (GST) M1-SUB construct has been described previously (Fiil et al., 2013; Keusekotten et al., 2013). All constructs have been verified by DNA sequencing.

For biochemical and structural studies, the coding sequence for the HOIP PUB domain was amplified using KOD HotStart DNA polymerase using the following primers: HOIP-1-Fwd AAGTTCTGTTTCAGGGCCCGATGCCGGGGGAGGAAGAG and HOIP-184 Rev ATGGTCTAGAAAGCTTTAATCTTCAACCTTGTCTTCCAACAG. The PCR product was cloned into pOPINB, which encodes a 3C cleavable N-terminal His6-tag (Berrow et al., 2007) using Infusion HD cloning (Clontech).

All mutations were generated by site directed mutagenesis using the QuikChange method with KOD HotStart DNA polymerase.

### ***Protein expression and purification***

HOIP PUB domain constructs were expressed in Rosetta2 (DE3) pLacI cells. Cells were grown at 30 °C in 2xTY medium supplemented with 30 µg/ml kanamycin and 34 µg/ml chloramphenicol to an OD600 of 0.8. The culture was cooled to 18 °C prior to overnight induction with 400 µM IPTG. Cells were resuspended and lysed by sonication in lysis buffer (20 mM Tris pH 7.4, 300 mM NaCl, 50 mM imidazole, 2 mM β-mercaptoethanol, lysozyme, DNaseI (Sigma) and protease inhibitor cocktail (Roche)). HOIP was purified by immobilized metal affinity chromatography using a HisTrap column (GE Life Sciences). The His6-tag was cleaved by overnight incubation with 3C protease. The protein was buffer exchanged into 20 mM Tris pH 8.5, 2 mM DTT and purified further by anion exchange chromatography (ResourceQ, GE Life Sciences). Eluted HOIP was then subjected to size exclusion chromatography (HiLoad 16/60 Superdex 75, GE Life Sciences) in buffer containing 20 mM Tris pH 8.5, 150 mM NaCl, 2 mM DTT. The resultant fractions were judged to be 99% pure following SDS-PAGE analysis and flash frozen. OTULIN was expressed and purified according to (Keusekotten et al., 2013). Human PNGase (aa 11-109) and UBXD1 (aa 150-264) proteins were a kind gift from Mark Allen (MRC LMB).

### ***Analytical size exclusion chromatography binding studies***

Binding studies using HOIP PUB domain and variants of OTULIN were performed on an AKTA Micro system (GE Life Sciences) using a Superdex 75 PC 3.2/30 column equilibrated SEC buffer (20 mM Tris pH 7.4, 150 mM NaCl, 2 mM DTT). HOIP PUB was mixed with OTULIN in a 1.2 : 1 molar ratio (30 µM HOIP and 25 µM OTULIN) and incubated at room temperature for 15 min. Fractions containing protein were mixed with SDS loading buffer prior to SDS-PAGE analysis.

### ***Crystallization***

Crystals of the HOIP PUB domain alone were grown by hanging-drop vapor diffusion. HOIP PUB was mixed with an equal volume of reservoir (1.3 M ammonium sulfate, 100 mM Tris (pH 8.5), 200 mM KI). Two crystal forms appeared over the course of two weeks; rod-shaped crystals that diffracted poorly and small rounded crystals that were used for diffraction experiments. Crystals were transferred into 3.5 M ammonium sulfate and vitrified prior to data collection. For crystallization of the HOIP-OTULIN peptide complex, a shorter construct of HOIP was used (5-180) that omitted terminal residues not observed in the electron density of the apo HOIP structure. HOIP 5-180 was mixed with a 1.5 molar excess of OTULIN peptide (49-67). Crystals were grown by sitting-drop vapor diffusion. HOIP OTULIN peptide complex were mixed with reservoir containing 32% PEG 6000, 1 M LiCl, 100 mM Tris (pH 8.4) in a 1:2 ratio. Crystals were transferred to a solution containing 34% PEG 6000, 1 M lithium chloride, 100 mM Tris (pH 8.4) prior to cryo-cooling.

### ***Data collection, structure determination and refinement***

Diffraction data were collected at Diamond Light Source beam lines I02 and I04. Diffraction images were processed using MOSFLM (Battye et al., 2011) and scaled using AIMLESS (Winn et al., 2011). The structure of apo HOIP was determined by molecular replacement using PHASER (McCoy et al., 2007) using the HOIP PUB domain structure deposited by the SGC (pdb-id 4juy) as a search model. 13 molecules of HOIP PUB domain were found within the asymmetric unit. Iterative rounds of model building and refinement were performed with COOT (Emsley et al., 2010) and PHENIX (Adams et al., 2011), respectively. The HOIP-OTULIN peptide structure was also determined by molecular replacement using a single HOIP PUB domain as a search model. Following model building and refinement the OTULIN peptide could be built unambiguously into the electron density. Data collection and refinement statistics can be found in **Table 1**. All structural figures were generated with Pymol ([www.pymol.org](http://www.pymol.org)).



### ***Fluorescence polarization binding assays***

10  $\mu$ l of 100 nM FITC-Ahx peptides of either OTULIN (49-67) or p97 (797-806) were aliquoted into a 384-well low volume plate (Corning). Serial dilutions of HOIP PUB into FP assay buffer (20 mM Tris pH 7.4, 100 mM NaCl, 1 mM DTT) were prepared and 10  $\mu$ l of this was aliquoted to FITC-Ahx peptide-containing wells. Fluorescence polarization was recorded on a PheraStar plate reader (BMG Labtech) using an optics module with  $\lambda_{\text{ex}} = 485$  nm and  $\lambda_{\text{em}} = 520$  nm. To derive binding constants ( $K_D$ ), polarization values were fitted to a one-site binding model using Graphpad Prism 5.

### ***Nuclear Magnetic Resonance Spectroscopy***

Uniformly labeled  $^{15}\text{N}$  or  $^{13}\text{C}$ ,  $^{15}\text{N}$  samples of HOIP were prepared following growth in 2M9 medium supplemented with either  $^{15}\text{N}$   $\text{NH}_4\text{Cl}$  or  $^{13}\text{C}$  glucose. Proteins were purified as described above and all samples were exchanged into NMR sample buffer (20 mM  $\text{Na}_2\text{HPO}_4/\text{NaH}_2\text{PO}_4$  pH 6.8, 50 mM NaCl, 2 mM DTT). Lyophilized OTULIN and p97 PIM peptides were reconstituted in NMR sample buffer and the pH adjusted to pH 6.8 prior to use. NMR data were acquired at 298K on Bruker Avance III 600 MHz and Avance2+ 700 MHz spectrometers, equipped with cryogenic triple resonance TCI probes. Standard triple resonance experiments (HNCA, HN(CO)CA, HNCACB, CBCA(CO)NH, HBHA(CO)NH) were acquired for the assignment of backbone HOIP resonances. In addition, constant-time (ct)  $^{13}\text{C}$  and  $^{13}\text{C}$ -HSQC were acquired for the methyl and aromatic regions. For assignment of the  $\text{H}\delta, \text{H}\epsilon$  resonances of HOIP tyrosines, (HB)CB(CGCD)HD and (HB)CB(CGCDCE)HE spectra were acquired, which coupled the  $\text{C}\beta$  position of the tyrosine resonances to the  $\text{H}\delta/\text{H}\epsilon$  position of the tyrosine ring respectively. Data processing and analysis were performed with Topspin3.0 (Bruker) and Sparky (<http://www.cgl.ucsf.edu/home/sparky/>).

### ***RNA interference***

Reverse transfection of HEK293T cells with siRNAs was performed using Lipofectamine RNAiMAX (Invitrogen) according to the manufacturer's

instructions. The following siRNA oligonucleotides (Sigma-Aldrich) were used for RNAi-mediated knockdown of OTULIN:

siOTULIN: GACUGAAAUUUGAUGGGAA, siMM  
GGGAUACCUAGACGUUCUA.

### ***Receptor stimulation***

U2OS/NOD2 cells were treated with 200 ng/mL NOD2 ligand L18-MDP (InvivoGen) or 10 ng/mL TNF $\alpha$  (R&D systems) for the indicated times. Both were added directly to the culture medium.

### ***Immunoprecipitation of HOIP-V5 and HA-OTULIN***

HEK293T or U2OS/NOD2 cells were transfected as indicated. The cells were lysed in IP buffer (25 mM HEPES pH 7.4, 150 mM KCl, 2 mM MgCl<sub>2</sub>, 1 mM EGTA, 0.5% (v/v) Triton X-100) supplemented with 5 mM NEM (Sigma-Aldrich), cOmplete protease inhibitor cocktail (Roche) and PhosSTOP (Roche). After 30 minutes on ice, the lysates were cleared by centrifugation and incubated overnight at 4 °C with anti-V5-agarose resin or anti-HA-agarose resin. The beads were washed four times in ice-cold IP buffer and the precipitated material was eluted with 0.2 M glycine, pH 2.5.

### ***Luciferase reporter assays***

Cells were co-transfected with the NF $\kappa$ B luciferase reporter construct pBIIXluc and the thymidine kinase-renilla luciferase construct to enable normalization of transfection efficiency. Cells were co-transfected with additional plasmids as indicated. After 24 h cells were lysed in 75  $\mu$ L passive lysis buffer (Promega) and luciferase activity was measured on a FLUOstar Omega Microplate Reader (BMG LABTECH GmbH, Offenburg, Germany) using the DualLuciferase<sup>®</sup> Assay System (Promega) according to the manufacturer's instructions. Protein expression levels were determined by SDS-PAGE and Western blotting of cell lysates as indicated. The data shown represents mean  $\pm$  SEM. A two-tailed Student's t-test was applied to evaluate statistical significance.

### ***Antibodies and affinity resin***

The following antibodies and reagents were used according to the manufacturers' instructions: anti-HA-agarose resin (A2095), anti-V5-agarose resin (A7345) and rabbit polyclonal anti-HOIP/RNF31 (SAB2102031, Sigma-Aldrich), rat monoclonal anti-HA (#11867423991, Roche Diagnostics, Burgess Hill, UK), mouse monoclonal anti-ubiquitin (IMG-5021, Imgenex, San Diego, CA), rabbit polyclonal anti-SHARPIN (#14626-1-AP, ProteinTech, Chicago, IL), rabbit polyclonal anti-RBCK1/HOIL-1 (NBP1-88301, Novus Biologicals, Littleton, CO), mouse monoclonal anti-V5 (MCA1360, AbD Serotec, Kidlington, UK), mouse monoclonal anti- $\beta$ -actin (MAB1501, Chemicon, Millipore, Billerica, MA), rabbit polyclonal anti-HOIL-1, rabbit polyclonal anti-HOIP/RNF31 (Sigma), mouse monoclonal anti-p97 (Thermo Scientific). The Fam105B/OTULIN antibody was previously described (Keusekotten et al., 2013). HRP-conjugated rabbit polyclonal anti-mouse IgG (P026002-2, Dako, Glostrup, Denmark), HRP-conjugated polyclonal goat anti-rabbit IgG (PI-1000, Vector Laboratories), HRP-conjugated goat polyclonal anti-rat IgG (#31470; Pierce, Thermo Scientific).

### ***Cell lines***

HEK293T and U2OS-Fip-In<sup>TM</sup> T-REx<sup>TM</sup> (U2OS/NOD2) were cultured as previously described (Damgaard et al., 2012; Fiil et al., 2013) and transfected using FuGeneHD and FuGene6 (Promega, Promega Corporation, Madison, WI, USA), respectively.

### ***Purification of endogenous Met1-polyUb conjugates***

Met1-polyUb conjugates were precipitated from U2OS/NOD2 cells using affinity reagents. For isolation of Met1-Ub chains, recombinant UBAN-GST fusion protein (M1-SUB) was used as described previously (Damgaard et al., 2013; Fiil et al., 2013). Briefly, the cells were lysed in buffer (20 mM Na<sub>2</sub>HPO<sub>4</sub>, 20 mM NaH<sub>2</sub>PO<sub>4</sub>, 1% NP-40, 2 mM EDTA) supplemented with 5 mM NEM (Sigma-Aldrich), cOmplete protease inhibitor cocktail (Roche), PhosSTOP (Roche) and 100 mg/mL M1-SUB. Lysates were cleared by centrifugation, mixed with Glutathione Sepharose 4B beads (GE Healthcare) and incubated

at 4 °C for a minimum of 2 h with rotation. Beads were washed five times in 500 mL ice-cold PBS Tween-20 (0.1%). Precipitated material was eluted with 1 x LSB-buffer.

### ***Size exclusion chromatography analysis of cell extracts***

HEK293ET, RPE1 and U2OS cells were collected, washed with PBS and lysed on ice for 30 minutes in SEC cell extraction buffer (150 mM NaCl, 50 mM Tris-HCl pH 7.4, 1 mM MgCl<sub>2</sub>, 1 mM DTT, 0.3% NP40, protease and (Roche)). Phosphatase inhibitors (Roche) were added unless otherwise stated. Lysates were centrifuged at 10,000 x g for 30 minutes and subsequently filtered with a 2 µm-pore minispin column pack (Generon). In total 3.1 mg protein extract was analyzed on a Superdex 200 10/300 GL column (GE Life Sciences). 0.5 mL fractions were collected concentrated by TCA precipitation. One twelfth of each fraction was loaded and resolved by SDS-PAGE, transferred to nitrocellulose membranes and immunoblotted against the respective antibodies.

### **Supplementary References**

Adams, P.D., Afonine, P.V., Bunkóczi, G., Chen, V.B., Echols, N., Headd, J.J., Hung, L.-W., Jain, S., Kapral, G.J., Grosse Kunstleve, R.W., et al. (2011). The Phenix software for automated determination of macromolecular structures. *Methods* 55, 94–106.

Battye, T.G.G., Kontogiannis, L., Johnson, O., Powell, H.R., and Leslie, A.G.W. (2011). iMOSFLM: a new graphical interface for diffraction-image processing with MOSFLM. *Acta Crystallogr D Biol Crystallogr* 67, 271–281.

Berrow, N.S., Alderton, D., Sainsbury, S., Nettleship, J., Assenberg, R., Rahman, N., Stuart, D.I., and Owens, R.J. (2007). A versatile ligation-independent cloning method suitable for high-throughput expression screening applications. *Nucleic Acids Res* 35, e45.

Damgaard, R.B., Fiil, B.K., Speckmann, C., Yabal, M., Stadt, U.Z., Bekker-Jensen, S., Jost, P.J., Ehl, S., Mailand, N., and Gyrd-Hansen, M. (2013). Disease-causing mutations in the XIAP BIR2 domain impair NOD2-dependent immune signalling. *EMBO Mol Med* 5, 1278–1295.

Damgaard, R.B., Nachbur, U., Yabal, M., Wong, W.W.-L., Fiil, B.K., Kastirr, M., Rieser, E., Rickard, J.A., Bankovacki, A., Peschel, C., et al. (2012). The Ubiquitin Ligase XIAP Recruits LUBAC for NOD2 Signaling in Inflammation and Innate Immunity. *Mol Cell*.

Emsley, P., Lohkamp, B., Scott, W.G., and Cowtan, K. (2010). Features and development of Coot. *Acta Crystallogr D Biol Crystallogr* *66*, 486–501.

Fiil, B.K., Damgaard, R.B., Wagner, S.A., Keusekotten, K., Fritsch, M., Bekker-Jensen, S., Mailand, N., Choudhary, C., Komander, D., and Gyrd-Hansen, M. (2013). OTULIN Restricts Met1-Linked Ubiquitination to Control Innate Immune Signaling. *Mol Cell* *50*, 818–830.

Gyrd-Hansen, M., Darding, M., Miasari, M., Santoro, M.M., Zender, L., Xue, W., Tenev, T., da Fonseca, P.C.A., Zvelebil, M., Bujnicki, J.M., et al. (2008). IAPs contain an evolutionarily conserved ubiquitin-binding domain that regulates NF-kappaB as well as cell survival and oncogenesis. *Nature Publishing Group* *10*, 1309–1317.

Kamiya, Y., Uekusa, Y., Sumiyoshi, A., Sasakawa, H., Hirao, T., Suzuki, T., and Kato, K. (2012). NMR characterization of the interaction between the PUB domain of peptide:N-glycanase and ubiquitin-like domain of HR23. *FEBS Lett* *586*, 1141–1146.

Keusekotten, K., Elliott, P.R., Glockner, L., Fiil, B.K., Damgaard, R.B., Kulathu, Y., Wauer, T., Hospenthal, M.K., Gyrd-Hansen, M., Krappmann, D., et al. (2013). OTULIN antagonizes LUBAC signaling by specifically hydrolyzing Met1-linked polyubiquitin. *Cell* *153*, 1312–1326.

McCoy, A.J., Grosse Kunstleve, R.W., Adams, P.D., Winn, M.D., Storoni, L.C., and Read, R.J. (2007). Phaser crystallographic software. *J Appl Crystallogr* *40*, 658–674.

Winn, M.D., Ballard, C.C., Cowtan, K.D., Dodson, E.J., Emsley, P., Evans, P.R., Keegan, R.M., Krissinel, E.B., Leslie, A.G.W., McCoy, A., et al. (2011). Overview of the CCP4 suite and current developments. *Acta Crystallogr D Biol Crystallogr* *67*, 235–242.
